## Cytosolic peptide accumulation activates the NLRP1 and CARD8 inflammasomes

Elizabeth L. Orth-He<sup>1,6</sup>, Hsin-Che Huang<sup>1,6</sup>, Sahana D. Rao<sup>1</sup>, Qinghui Wang<sup>2</sup>, Qifeng Chen<sup>2</sup>, Claire M. O'Mara<sup>2</sup>, Ashley J. Chui<sup>1</sup>, Michelle Saoi<sup>3</sup>, Andrew R. Griswold<sup>4,5</sup>, Abir Bhattacharjee<sup>2</sup>, Daniel P. Ball<sup>2</sup>, Justin R. Cross<sup>3</sup> & Daniel A. Bachovchin<sup>1,2,4,5\*</sup>

### Affiliations:

<sup>1</sup> Tri-Institutional PhD Program in Chemical Biology, Memorial Sloan Kettering Cancer Center, New York, New York 10065, USA.

<sup>2</sup> Chemical Biology Program, Memorial Sloan Kettering Cancer Center, New York, New York 10065, USA.

<sup>3</sup> Donald B. and Catherine C. Marron Cancer Metabolism Center, Memorial Sloan Kettering Cancer Center, New York, New York 10065, USA.

<sup>4</sup> Weill Cornell/Rockefeller/Sloan Kettering Tri-Institutional MD-PhD Program, New York, New York 10065, USA.

<sup>5</sup> Pharmacology Program of the Weill Cornell Graduate School of Medical Sciences, Memorial Sloan Kettering Cancer Center, New York, New York 10065, USA.

<sup>6</sup> These authors contributed equally

\*Correspondence to Daniel A. Bachovchin: [bachovcd@mskcc.org](mailto:bachovcd@mskcc.org)

1 **ABSTRACT**

2 NLRP1 and CARD8 are related sensors that form inflammasomes, but the danger signals that  
3 they detect are not fully established. These proteins undergo autoproteolysis, generating  
4 repressive N-terminal (NT) and inflammatory C-terminal (CT) fragments. The proteasome-  
5 mediated degradation of the NT releases the CT from autoinhibition, but the CT is then  
6 sequestered in a complex with the full-length sensor and DPP9. Here, we show that cytosolic  
7 peptide accumulation activates these inflammasomes. We found that a diverse array of peptides  
8 accelerates NT degradation, and those with N-terminal XP sequences also destabilize the ternary  
9 complexes. Peptides interfere with many biological processes, including protein folding. We  
10 show that unrelated agents that disrupt protein folding also induce NT degradation, but do not  
11 cause inflammasome activation because DPP9 sequesters the CT fragments in the absence of  
12 XP peptides. Overall, these results indicate that NLRP1 and CARD8 detect protein misfolding  
13 that is associated with peptide accumulation.

14

15

16

17

## 18 INTRODUCTION

19 Mammals express at least six pattern recognition receptors (PRRs) that sense danger-  
20 associated signals and nucleate the formation of signaling platforms called inflammasomes (Broz  
21 and Dixit, 2016). Inflammasomes recruit and activate the cysteine protease caspase-1, which  
22 then cleaves and activates the pore-forming protein gasdermin D (GSDMD) and (in most cases)  
23 the inflammatory cytokines interleukin-1 $\beta$  and -18 (IL-1 $\beta$ /18), triggering a lytic form of cell death  
24 called pyroptosis. NLRP1 (nucleotide-binding domain leucine-rich repeat pyrin domain-  
25 containing 1) and CARD8 (caspase activation and recruitment domain-containing 8) are related  
26 human PRRs that form inflammasomes, and a series of recent studies have made considerable  
27 progress in elucidating their activation mechanisms (Chui et al., 2019; Hollingsworth et al., 2021;  
28 Huang et al., 2021; Johnson et al., 2018; Okondo et al., 2017; Okondo et al., 2018; Sharif et al.,  
29 2021; Zhong et al., 2018). However, the danger signals that these inflammasomes evolved to  
30 sense have not yet been definitively established (Bachovchin, 2021).

31 The human NLRP1 (hNLRP1) protein has an N-terminal pyrin domain (PYD) and a  
32 disordered region preceding the nucleotide-binding (NACHT), leucine-rich repeat (LRR), function-  
33 to-find (FIIND), and caspase activation and recruitment domains (CARDs) (**Fig. 1A**). CARD8 has  
34 an N-terminal disordered stretch of ~160 amino acids followed by a similar FIIND-CARD region  
35 (**Fig. 1A**). The NLRP1 and CARD8 FIINDs undergo autoproteolysis between their ZU5 (ZO-1 and  
36 UNC5) and UPA (conserved in UNC5, PIDD, and ankyrin) subdomains, generating N-terminal  
37 (NT) and C-terminal (CT) polypeptide chains that remain non-covalently associated in an  
38 autoinhibited state (D'Oswaldo et al., 2011; Finger et al., 2012; Frew et al., 2012). Mice have two  
39 functional NLRP1 homologs (mNLRP1A and B) and rats have one NLRP1 homolog (rNLRP1),  
40 but neither rodent species has a CARD8 homolog. The rodent NLRP1 proteins lack the N-  
41 terminal PYD but otherwise have domain organizations like hNLRP1. NLRP1 is highly  
42 polymorphic both within and across species, and at least five distinct alleles of rNLRP1 and  
43 mNLRP1B are present in inbred rat and mouse strains (Boyden and Dietrich, 2006; Newman et

44 al., 2010). Despite their considerable diversity in primary sequence, all NLRP1 and CARD8  
45 alleles are activated via a process called “functional degradation”, in which the proteasome-  
46 mediated destruction of the NT fragment releases the CT fragment to nucleate an inflammasome  
47 (Chui et al., 2019; Sandstrom et al., 2019).

48 A wide array of unrelated pathogen-derived stimuli, including bacterial and viral proteases,  
49 E3 ligases, and long dsRNA, have been reported to activate at least one human or rodent NLRP1  
50 allele via functional degradation (**Table S1**) (Boyden and Dietrich, 2006; Hornung et al., 2009;  
51 Robinson et al., 2020; Sandstrom et al., 2019; Tsu et al., 2020). The most well-studied of these  
52 is the anthrax lethal factor (LF) metalloprotease, which cleaves some rodent NLRP1 alleles near  
53 their N-termini and thereby generates unstable neo-N-termini that are rapidly recognized and  
54 degraded by the N-end rule proteasome degradation pathway (Chui et al., 2019; Frew et al., 2012;  
55 Sandstrom et al., 2019). Notably, none of these pathogen-derived stimuli, including LF, universally  
56 activate all functional human and rodent NLRP1 alleles. Similarly, HIV protease recently was  
57 discovered to cleave human CARD8 and thereby activate the CARD8 inflammasome, but not the  
58 rodent or human NLRP1 proteins (Wang et al., 2021). Collectively, these observations have  
59 fueled speculation that the various polymorphic human and rodent NLRP1 alleles and human  
60 CARD8 each evolved independently to detect one or more entirely distinct pathogen-associated  
61 signals.

62 Alternatively, it is possible that all NLRP1 alleles (and potentially CARD8) evolved to sense  
63 a single, specific cellular danger state that has yet to be identified (Bachovchin, 2021). Consistent  
64 with this premise, potent inhibitors of the dipeptidyl peptidases 8 and 9 (DPP8/9) activate all  
65 functional NLRP1 and CARD8 alleles (**Table S1**) (Gai et al., 2019; Johnson et al., 2018; Okondo  
66 et al., 2018; Zhong et al., 2018). DPP8/9 are serine proteases that cleave XP dipeptides (X is  
67 any amino acid) from the N-termini of unstructured polypeptides (**Fig. 1B,C**) (Geiss-Friedlander  
68 et al., 2009; Griswold et al., 2019b; Tang et al., 2009). Potent DPP8/9 inhibitors, including Val-  
69 boropro (VbP, **Fig. 1C**), induce inflammasome formation via two distinct mechanisms. First, the

70 inhibition of DPP8/9's enzymatic activity accelerates the proteasome-mediated degradation of  
71 many misfolded and disordered proteins, including the CARD8<sup>NT</sup> and NLRP1<sup>NT</sup> fragments, via a  
72 poorly understood pathway (**Fig. 1D**) (Chui et al., 2020; Chui et al., 2019; Griswold et al., 2019a).  
73 Second, potent DPP8/9 inhibitors destabilize a repressive ternary complex that forms between  
74 DPP9 (or DPP8), the full-length (FL) PRR, and the liberated CT fragment that restrains spurious  
75 inflammasome formation by low levels of the free CT (**Fig. 1D**) (Hollingsworth et al., 2021; Huang  
76 et al., 2021; Sharif et al., 2021). Thus, DPP8/9 appear to be somehow connected to the primordial  
77 function of NLRP1 and CARD8 inflammasomes, including to a specific danger state that these  
78 inflammasomes universally sense (**Fig. 1D**) (Bachovchin, 2021). However, the identity of the  
79 danger state linked to DPP8/9 remains unknown.

80 Bestatin and bestatin methyl ester (MeBs, a more cell permeable analog of bestatin) are  
81 non-specific inhibitors of M1, M17, and M20 metallo-aminopeptidases (APs), which are enzymes  
82 that cleave single N-terminal amino acids from polypeptide chains (**Fig. 1B,C**) (Burley et al., 1991;  
83 Suda et al., 1976; Tsuge et al., 1994). MeBs has been reported to elicit several biological effects,  
84 including blockade of the N-end rule pathway (Wickliffe et al., 2008), degradation of the cellular  
85 inhibitor of apoptosis protein 1 (cIAP1) (Sekine et al., 2008), and starvation of intracellular amino  
86 acids (Krige et al., 2008; Vabulas and Hartl, 2005). Intriguingly, we found that MeBs induces  
87 pyroptotic cell death in *DPP8*<sup>-/-</sup>/*DPP9*<sup>-/-</sup> (*DPP8/9*<sup>-/-</sup>), but not in wild-type, THP-1 cells (Chui et al.,  
88 2019). MeBs also synergizes with VbP to induce more pyroptosis in THP-1 cells, RAW 264.7  
89 cells, and primary bone-marrow derived macrophages (BMDMs) from Sprague-Dawley (SD) rats  
90 (Chui et al., 2019; Gai et al., 2019) as well as more serum G-CSF production in C57BL6/J mice  
91 (Chui et al., 2019). As these cell types and animals all express CARD8 and NLRP1 alleles (**Table**  
92 **S2**), MeBs appears to augment the activation of all NLRP1 and CARD8 alleles after genetic or  
93 pharmacologic inactivation of DPP8/9. Notably, the structurally unrelated AP inhibitors CHR-2797  
94 and batimastat (**Fig. 1C**) similarly induce synergistic pyroptosis, strongly suggesting these  
95 responses are due to AP inhibition and not some off-target activity of MeBs (Chui et al., 2019).

96 Thus, it appears that AP inhibition also contributes in some way to the inflammasome-activating  
97 danger state (**Fig. 1D**).

98 Here, we investigated the mechanistic basis for the synergy between AP and DPP8/9  
99 inhibitors. We found that AP inhibition alone (i.e., without simultaneous DPP8/9 inhibition) induces  
100 the accumulation of many proteasome-derived peptides, but not those with XP N-termini, and  
101 thereby accelerates the degradation of the NT fragments. However, DPP8/9 ternary complexes  
102 effectively quench the CT fragments released by this mechanism. Peptides are known to interfere  
103 with many biological processes, including chaperone-mediated protein folding (Li et al., 2003;  
104 Otvos et al., 2000). Notably, we found that distinct agents that disrupt protein folding similarly  
105 stimulate NT degradation, but pyroptosis is again suppressed by the DPP8/9 complexes. We  
106 show that proteasome-derived peptides with XP N-termini, which are mimicked by VbP, must also  
107 accumulate to overcome the DPP8/9 checkpoint. Overall, we propose that NLRP1 and CARD8  
108 detect protein misfolding linked to cytosolic peptide build-up.

109

## 110 **RESULTS**

### 111 **AP inhibitors synergize with DPP8/9 inhibitors**

112 We first wanted to comprehensively characterize the relationship between AP inhibitors  
113 and inflammasome activation. VbP activates the CARD8 inflammasome in several human acute  
114 myeloid leukemia cell lines, including THP-1 (albeit only minimally after 6 h), MV4;11, and OCI-  
115 AML2 cells (**Table S2**) (Johnson et al., 2018). As expected, we found that VbP induced at least  
116 some pyroptosis in these cells after 6 h, as evidenced by LDH release and GSDMD cleavage  
117 (into the p30 NT fragment) assays (**Fig. 2A–C, Fig. S1A–B**). Also as expected, VbP did not  
118 induce any additional pyroptosis in *DPP8/9*<sup>-/-</sup> THP-1 cells (**Fig. 2A**). In contrast and as previously  
119 reported, MeBs, CHR-2797, and batimastat did not induce pyroptosis in wild-type (WT) THP-1  
120 cells, but did induce pyroptosis in *DPP8/9*<sup>-/-</sup> THP-1 cells (**Fig. 2A**) and in WT THP-1, MV4;11,  
121 and OCI-AML2 cells also treated with VbP (**Fig. 2B,C, Fig. S1A,B**) (Chui et al., 2019). This death

122 was entirely mediated by CARD8, as *CARD8*<sup>-/-</sup> cells were completely resistant to the  
123 combinations (**Fig. 2B, Fig. S1B**). Similarly, MeBs also induced synergistic pyroptosis with VbP  
124 in human naive CD3 T cells (**Fig. 2D**), which express a functional CARD8 inflammasome  
125 (Johnson et al., 2020; Linder et al., 2020). Thus, AP inhibitors increase VbP- and *DPP8/9*  
126 knockout-induced inflammasome activation in both immortalized and primary cells with  
127 endogenous CARD8. It should be noted that these AP inhibitors were not toxic on their own at  
128 these 6 h time points, but that they do induce apoptosis over longer ( $\geq 12$  h) intervals, as  
129 evidenced by caspase-1-independent death involving poly(ADP-ribose) polymerase (PARP)  
130 cleavage (**Fig. S1C,D**).

131 We recently discovered that weak inhibitors of DPP8/9 (e.g., those with IC<sub>50</sub> values > 10  
132  $\mu$ M, ~ 4 orders of magnitude higher than VbP), including Val-Pro (VP) and Ile-Pro (IP) dipeptides,  
133 selectively activate the CARD8 inflammasome (Rao et al., 2022). These molecules do not  
134 activate NLRP1 likely because the NLRP1<sup>CT</sup>, unlike the CARD8<sup>CT</sup>, directly contacts the DPP8/9  
135 active site in the ternary complex and forms a tighter interaction that is more difficult to sufficiently  
136 destabilize (Hollingsworth et al., 2021; Sharif et al., 2021). High concentrations of these  
137 dipeptides can be introduced into cells in three ways: 1) treatment with cell permeable esterified  
138 dipeptides, including VP methyl ester (VP-OMe); 2) treatment with the small molecule CQ31 (**Fig.**  
139 **1C**), which inhibits the M24B aminopeptidases prolidase (PEPD) and Xaa-Pro aminopeptidase 1  
140 (XPNPEP1) and blocks the hydrolysis of endogenous XP dipeptides (Rao et al., 2022); or 3) by  
141 genetic knockout of *PEPD* and/or *XPNPEP1*. We found that MeBs synergizes with VP-OMe and  
142 CQ31 to induce more CARD8-dependent pyroptosis (**Fig. 2E,F, Fig. S1E,F**). Similarly, we found  
143 that MeBs induced pyroptosis in *PEPD*<sup>-/-</sup> THP-1 cells, *PEPD*<sup>-/-</sup>/*XPNPEP1*<sup>-/-</sup> THP-1 cells, and  
144 *PEPD*<sup>-/-</sup> MV4;11 cells (**Fig. S1G,H**), as well as in *PEPD*<sup>-/-</sup> HEK 293T cells ectopically expressing  
145 the CARD8 inflammasome components (**Fig. S1I**). In contrast, knockout of *XPNPEP1* alone did  
146 not engender MeBs sensitivity, demonstrating that PEPD is the more important of these two

147 enzymes in restraining CARD8 activation (**Fig. S1H**). Overall, these data show that MeBs also  
148 synergizes with XP-containing peptides to more strongly activate the CARD8 inflammasome.

149 We next wanted to investigate the impact of MeBs on NLRP1 inflammasome activation.  
150 We found that MeBs induced synergistic pyroptosis with VbP in RAW 264.7 and J774.1 mouse  
151 macrophages (**Fig. 2G, Fig. S1J**), both of which express mNLRP1B allele 1 (**Table S2**), and in  
152 immortalized human N/TERT-1 keratinocytes (**Fig. 2H**), which express hNLRP1 (**Table S2**). It  
153 should be noted that the human NLRP1 inflammasome, but not the human CARD8  
154 inflammasome, releases cleaved IL-1 $\beta$  (Ball et al., 2020), and therefore we evaluated IL-1 $\beta$   
155 release in N/TERT-1 keratinocytes. In addition, MeBs induced substantial NLRP1-dependent  
156 ASC speck formation in *DPP9<sup>-/-</sup>*, but not control, HEK 293T cells ectopically expressing human  
157 NLRP1 and GFP-tagged ASC (**Fig. S1K**). As mentioned above, CQ31 does not activate the  
158 human or rodent NLRP1 inflammasome as a single agent (Rao et al., 2022). Intriguingly,  
159 however, we found that the combination of CQ31 and MeBs does activate NLRP1 in N/TERT-1  
160 keratinocytes (**Fig. 2I**). In contrast, this drug combination still did not activate the mouse NLRP1B  
161 in RAW 264.7 cells (**Fig. S1L**), which we speculate is because the mouse NLRP1 inflammasomes  
162 have particularly high activation thresholds (Cirelli et al., 2014; Ewald et al., 2014; Johnson et al.,  
163 2020). Regardless, these data, coupled with our previous results (Chui et al., 2019), show that  
164 AP inhibitors synergize with VbP, XP peptides, or *DPP8/9* knockout to induce greater CARD8 and  
165 NLRP1 inflammasome responses. Importantly, MeBs did not impact lipopolysaccharide (LPS)  
166 plus nigericin activation of the NLRP3 inflammasome in THP-1 cells (**Fig. S1M**), showing that this  
167 synergy is specific to the NLRP1 and CARD8 inflammasome pathways.

168

### 169 **MeBs accelerates NT degradation**

170 We next wanted to determine if AP inhibitors induce synergistic inflammasome activation  
171 by accelerating NT degradation or by destabilizing the DPP8/9 ternary complexes (**Fig. 1D**). As  
172 MeBs does not interact with DPP8/9 (Rao et al., 2022), we reasoned that MeBs likely does not



173 directly interfere with the ternary complexes. Indeed, we previously found that MeBs does not  
174 displace NLRP1 or CARD8 from immobilized DPP9 *in vitro* (Hollingsworth et al., 2021; Sharif et  
175 al., 2021). Moreover, we demonstrated above that AP inhibitors induce pyroptosis in *DPP8/9*<sup>-/-</sup>  
176 THP-1 cells that completely lack these repressive complexes (**Fig. 2A**). However, it remained  
177 possible that AP inhibition indirectly destabilizes the ternary complexes in cells, and that this, at  
178 least in part, contributes to inflammasome activation. We previously developed a method to test  
179 ternary complex destabilization in cells that leverages the degradation tag (dTAG) system, in  
180 which the small molecule dTAG-13 is used to rapidly trigger the degradation of proteins with  
181 FKBP12<sup>F36V</sup> tags (dTAGs) (**Fig. 3A**) (Nabet et al., 2018; Sharif et al., 2021). Briefly, we create  
182 the DPP8/9 ternary complex in cells by ectopically expressing the CARD8 ZU5-UPA-CARD region  
183 with an N-terminal dTAG (dTAG-CARD8<sup>ZUC</sup>) together with an autoproteolysis-defective S297A  
184 mutant CARD8 FIIND domain (FIIND<sup>SA</sup>); treatment of these cells with dTAG-13 releases the free  
185 CARD8<sup>CT</sup> to form ternary complexes with the FIIND<sup>SA</sup> and endogenous DPP9 (**Fig. 3A**). DPP8/9  
186 inhibitors, including VbP, compound 8j, and VP-OMe, destabilize these complexes and induce  
187 pyroptosis in HEK 293T cells that also stably express CASP1 and GSDMD (**Fig. 3A, Fig. S2A**).  
188 It should be noted that DPP8/9 inhibitors do not activate dTAG-CARD8<sup>ZUC</sup> on their own (i.e.,  
189 without dTAG-13) because this fusion protein lacks the N-terminal disordered region of CARD8  
190 required for DPP8/9 inhibitor-induced pyroptosis (Chui et al., 2020). Notably, we found that MeBs  
191 did not induce additional cell death on its own or in combination with VbP after dTAG-13 treatment  
192 (**Fig. 3B, Fig. S2A**). Thus, MeBs does not directly or indirectly destabilize the repressive DPP8/9  
193 ternary complexes, at least to the extent we can determine using the assays described above.

194 Instead, we hypothesized that MeBs mainly accelerated NT degradation. We found that  
195 neither VbP, MeBs, nor the combination induced visible CARD8<sup>FL</sup> or CARD8<sup>NT</sup> depletion in  
196 *CASP1*<sup>-/-</sup> MV4;11 cells by immunoblotting after 6 h (**Fig. S2B,C**). However, this result was not  
197 surprising, as only small amounts of free CTs are needed to form inflammasomes (Chui et al.,  
198 2019; Sandstrom et al., 2019). We previously found that VbP does cause some observable

199 CARD8<sup>NT</sup> depletion over longer treatment times (Chui et al., 2020); MeBs similarly appeared to  
200 induce some CARD8<sup>NT</sup> depletion after 48 h (**Fig. S2D**), but this result was not statistically  
201 significant ( $p = 0.059$ ) and was potentially confounded by the toxicity of MeBs over longer  
202 incubation times (**Fig. S1C,D**). Nevertheless, we found that the proteasome inhibitor bortezomib  
203 completely blocked MeBs-induced pyroptosis in *DPP8/9*<sup>-/-</sup> and *PEPD*<sup>-/-</sup> THP-1 cells (**Fig. 3C, Fig.**  
204 **S2E**), as well as MeBs plus VbP-induced pyroptosis in WT MV4;11 cells (**Fig. S2F**). Thus, MeBs  
205 likely stimulates synergistic pyroptosis by triggering more NT degradation. We provide additional  
206 evidence that AP inhibition indeed induces NT degradation using NLRP1 and CARD8 mutants  
207 that cannot bind DPP8/9, as described below.

208

### 209 **The DPP9 ternary complex restrains AP inhibitor-induced pyroptosis**

210 We next wanted to determine why AP inhibitors only activated the NLRP1 and CARD8  
211 inflammasomes in combination with DPP8/9 inhibitors. We envisioned two possibilities: 1) AP  
212 inhibition alone accelerates NT degradation, but that the CT fragments freed by this mechanism  
213 are effectively quenched by DPP8/9 ternary complexes in the absence of DPP8/9 inhibitors; or 2)  
214 AP activity is only critical in the absence of DPP8/9 activity, perhaps because APs cleave  
215 pyroptosis-inducing DPP substrates to some extent.

216 To distinguish between these possibilities, we needed to evaluate the impact of MeBs on  
217 inflammasome activation in cells with DPP8/9 enzymatic activity but without the ability to form  
218 DPP8/9 ternary complexes. We previously discovered that E274R mutant CARD8 does not bind  
219 to DPP9 and could be used for such an experiment (Sharif et al., 2021). We next generated  
220 *CARD8*<sup>-/-</sup> THP-1 cells containing doxycycline (DOX)-inducible WT CARD8, DPP9-non-binding  
221 CARD8 E274R, or autoproteolysis-dead CARD8 S297A constructs (**Fig. 3D**). As expected, cells  
222 ectopically expressing WT CARD8 responded to VbP and MeBs like WT THP-1 cells (see **Fig.**  
223 **2A,B**), whereas cells expressing CARD8 S297A were non-responsive (**Fig. 3D**). Also as  
224 expected, the expression of CARD8 E274R caused some spontaneous death because DPP9

225 cannot physically restrain free CARD8<sup>CT</sup> fragments generated during homeostatic protein  
226 turnover in these cells. Notably, we found that MeBs induced considerably more pyroptosis in  
227 CARD8 E274R-expressing cells (**Fig. 3D,E**), and that this death was blocked by the CASP1  
228 inhibitor VX765 and the proteasome inhibitors bortezomib and MG132 (**Fig. 3E**). Collectively,  
229 these data indicate that MeBs alone (e.g., without VbP co-treatment) accelerates CARD8<sup>NT</sup>  
230 degradation, but that DPP8/9 and CARD8<sup>FL</sup> effectively sequester the released CARD8<sup>CT</sup>  
231 fragments in ternary complexes. DPP8/9 inhibitors destabilize these repressive complexes and  
232 thereby synergize with AP inhibitors. Intriguingly, VbP itself did not cause significantly more death  
233 in cells expressing CARD8 E274R (**Fig. 3D**), indicating that VbP is a much weaker inducer of  
234 CARD8<sup>NT</sup> degradation than MeBs.

235 We next wanted to perform an analogous experiment with NLRP1. We previously  
236 established that NLRP1 LL1193EE and NLRP1 P1214R have abolished and weakened DPP9  
237 binding, respectively (Hollingsworth et al., 2021). We therefore generated *CARD8*<sup>-/-</sup> THP-1 cells  
238 containing doxycycline (DOX)-inducible WT NLRP1, NLRP1 LL1193EE, NLRP1 P1214R, and  
239 NLRP1 S1213A (autoproteolysis-dead) constructs. As expected, cells ectopically expressing WT  
240 NLRP1 and NLRP1 S1213A responded to VbP and MeBs like NLRP1 WT and knockout cells,  
241 respectively (**Fig. S2G**). We found that the ectopic expression of NLRP1 LL1193EE triggered a  
242 high level of spontaneous pyroptosis that was not increased by either VbP or MeBs, suggesting  
243 death is already at a maximal level that cannot be increased further. Interestingly, we found that  
244 the expression of NLRP1 P1214R induced some spontaneous death, which was further increased  
245 by both MeBs and VbP. Bortezomib and MG132 attenuated MeBs-enhanced cell death (**Fig.**  
246 **S2H**), indicating that MeBs was similarly accelerating NLRP1<sup>NT</sup> degradation. As P1214R mutant  
247 NLRP1 still retains some binding with DPP9 (Hollingsworth et al., 2021), VbP's activity in this  
248 assay is likely due, at least in part, to ternary complex disruption. Regardless, these data show  
249 that AP inhibition alone induces NLRP1<sup>NT</sup> degradation, but that the DPP8/9 ternary complex  
250 effectively sequesters the inflammasome-forming CT fragments in these cells.

251

## 252 **Amino acid starvation does not activate NLRP1 and CARD8**

253 We next wanted to identify the AP inhibitor-induced “danger signal” that accelerates NT  
254 degradation. Notably, the proteasome digests virtually all intracellular proteins at some point into  
255 peptides, and then numerous cytosolic peptidases rapidly hydrolyze these peptides into free  
256 amino acids (Kisselev et al., 1999). Intriguingly, both M1/17/20 APs and DPP8/9 are thought to  
257 be involved in the catabolism of proteasome-generated peptides (**Fig. 1C, Fig. 4A**) (Geiss-  
258 Friedlander et al., 2009; Griswold et al., 2019b; Saric et al., 2004). As such, we hypothesized  
259 that MeBs and VbP might interfere with peptide catabolism, thereby causing cytosolic peptide  
260 accumulation and/or amino acid starvation, one of which might trigger inflammasome activation  
261 (**Fig. 4A**).

262 Proteasome inhibitors and MeBs have previously been reported to cause amino acid  
263 deprivation, especially during periods of extracellular nutrient restriction (Krige et al., 2008;  
264 Suraweera et al., 2012; Vabulas and Hartl, 2005). We therefore first wanted to investigate the  
265 relative impacts of bortezomib, MeBs, and VbP on the recycling of amino acids from protein. To  
266 do this, we cultured HEK 293T cells in media containing [U-<sup>13</sup>C]-L-leucine and [U-<sup>13</sup>C]-L-glutamine  
267 for 23 days to incorporate isotopically labeled leucine, glutamine, and glutamine-derived amino  
268 acids (e.g., asparagine and proline) into proteins (**Fig. S3A**). We then replaced this media with  
269 unlabeled media, treated cells with DMSO or inhibitors for 6 h, and extracted and quantified small  
270 molecule metabolites (**Fig. S3B**). We found that bortezomib and MeBs both significantly slowed  
271 the release of heavy proline and asparagine from proteins (**Fig. 4B**), but that only bortezomib  
272 significantly slowed the release of heavy leucine (**Fig. S3C**). VbP did not inhibit the recycling of  
273 these amino acids, indicating that DPP8/9 do not play a critical a role in amino acid recycling (**Fig.**  
274 **4B, Fig. S3C**). However, even though MeBs inhibited the release of proline and arginine from  
275 protein, neither MeBs, VbP, nor the combination significantly decreased the overall level of any  
276 amino acid in WT, *DPP8/9*<sup>-/-</sup> or *PEPD*<sup>-/-</sup> HEK 293T cells (**Fig. 4C, Table S3**). Consistently, these

277 drugs did not decrease P70-S6K or 4E-BP-1 phosphorylation or increase eIF2 $\alpha$  phosphorylation,  
278 key markers of intracellular amino acid starvation (**Fig. 4D**). External amino acid deprivation and  
279 treatment with the mammalian target of rapamycin (mTOR) inhibitor Torin 1, both of which  
280 modulate these markers, were used as controls in this experiment. Furthermore, we found that  
281 removal of all amino acids from the media had no impact on VbP- or VbP plus MeBs-induced  
282 CARD8-dependent pyroptosis in MV4;11 cells (**Fig. 4E**). Thus, these data show that DPP8/9 and  
283 M1/17/20 AP blockade does not impact intracellular amino acid supply, at least during times of  
284 extracellular nutrient sufficiency, and more generally that acute amino acid depletion does not  
285 cause NLRP1 or CARD8 inflammasome activation.

286

#### 287 **AP inhibition causes proteasome-dependent peptide accumulation**

288         Instead, we reasoned that the accumulation of peptides in the cytosol caused by AP  
289 inhibition might be the danger-associated signal (**Fig. 4A**). Cytosolic bestatin-sensitive APs are  
290 thought to primarily cleave peptides <10 residues long into their constituent amino acids, removing  
291 one residue at a time sequentially from their N termini (Saric et al., 2004) (**Fig. S4A**). When a  
292 conformationally-restricted proline residue is in the penultimate position from the N-terminus,  
293 however, most APs cannot remove the N-terminal amino acid. Instead, DPP8/9 likely act to  
294 remove the N terminal Xaa-Pro dipeptide (Geiss-Friedlander et al., 2009; Griswold et al., 2019b),  
295 thereby enabling APs to continue digesting the rest of the polypeptide chain (**Fig. S4A**).  
296 Consistent with this mechanism, MeBs, bestatin, CHR-2797 and batimastat, but not VbP,  
297 significantly inhibited the cleavage of fluorescent Ala-7-amino-4-methylcoumarin (Ala-AMC) and  
298 Leu-AMC reporter substrates in cells (**Fig. 5A,B**); in contrast, VbP, but not MeBs, blocked the  
299 cleavage of Ala-Pro-AMC in cells (**Fig. 5C**). Moreover, MeBs significantly slowed the release of  
300 alanine from a model PASKYLF peptide in lysates, confirming previous data that bestatin-  
301 sensitive enzymes also cleave peptides longer than 2-3 amino acids (**Fig. 5D, Fig. S4B**) (Saric  
302 et al., 2004).

303           Based on these results, we predicted that MeBs and VbP would lead to peptide  
304 accumulation in cells, whereas bortezomib would conversely deplete peptides. To explore this  
305 idea, we next treated cells with either MeBs, VbP, or bortezomib before assessing the levels of  
306 various dipeptides, which can be measured by liquid chromatography-mass spectrometry (LC-  
307 MS). Consistent with the known instability of cytosolic peptides, we identified very low levels of  
308 dipeptides in DMSO- and bortezomib-treated cells (**Fig. 5E,F, Fig. S4C,D**). However, we  
309 observed a striking accumulation of many dipeptides in MeBs-treated HEK 293T and THP-1 cells  
310 (**Fig. 5E,F, Fig. S4C,D**). Moreover, we found that pre-treatment of cells with bortezomib prior to  
311 the addition of MeBs blocked the accumulation of these dipeptides (**Fig. 5F, Fig. S4C**),  
312 demonstrating that these dipeptides were formed downstream of the proteasome (**Fig. 4A**). We  
313 previously showed that CQ31, which inhibits PEPD from cleaving XP dipeptides, causes the  
314 accumulation of several Xaa-Pro dipeptides, including GP, IP, and VP, in cells (Rao et al., 2022).  
315 Notably, MeBs did not substantially stabilize XP dipeptide levels like CQ31 (**Fig. S4D**), although  
316 the level of GP was slightly higher in some MeBs-treated samples (**Fig. S4E**). Thus, MeBs blocks  
317 the hydrolysis of many dipeptides, but generally not XPs. These data are consistent with our  
318 finding that MeBs does not profoundly destabilize the ternary complexes, although it is possible  
319 that the low levels of MeBs-stabilized XP peptides have a small impact on this repressive  
320 structure.

321           Unlike MeBs and CQ31, VbP did not induce the accumulation of any of the dipeptides  
322 measured (**Fig. 5E, Fig. S4D,E**), consistent with DPP8/9 only hydrolyzing peptides containing at  
323 least three amino acids. Based on the known specificities of DPP8/9 and M1/17/20 APs, we  
324 expect that both VbP and MeBs would cause the accumulation of longer proteasome-derived  
325 peptides (e.g., see **Fig. 5D**), but, as these longer peptides include a vast array of distinct  
326 sequences likely occurring at relatively low concentrations, they are not easily measured using  
327 standard metabolomics or proteomics methods. Regardless, these data show that AP inhibition  
328 results in the accumulation of proteasome-derived peptides. It should be noted that, because

329 peptides are typically not cell penetrant and any intracellular peptides are rapidly degraded, AP  
330 inhibition is to our knowledge the only known way to increase intracellular peptide levels. As such,  
331 we are unable to simply introduce high levels of peptides to the cytosol to directly confirm that  
332 they accelerate NT degradation.

333

### 334 **clAP1 is not involved in inflammasome activation**

335 We next sought to investigate potential links between peptide accumulation and  
336 accelerated NT degradation. As mentioned above, MeBs is known to induce several additional  
337 specific biological effects, including blockade of the N-end rule pathway (Wickliffe et al., 2008)  
338 and degradation of the clAP1 (Sekine et al., 2008), which we reasoned were likely due to the  
339 accumulation of intracellular peptides. The N-end rule pathway consists of a number of E3 ligases  
340 that bind and ubiquitinate proteins with destabilizing N-terminal residues (Varshavsky, 2011), and  
341 we speculate that MeBs induces the accumulation of peptides that compete with destabilizing N-  
342 termini for binding to these E3 ligases. However, we previously showed that the N-end rule  
343 pathway is not involved in DPP8/9 inhibitor-induced pyroptosis (Chui et al., 2019). Thus, we next  
344 turned our attention to clAP1.

345 clAP1 is one of eight mammalian inhibitor of apoptosis proteins (IAPs) involved in  
346 controlling caspase activation (Gyrd-Hansen and Meier, 2010; Labbe et al., 2011; Vince et al.,  
347 2012). clAP1 has three N-terminal baculoviral IAP repeat (BIR) domains (BIR1-3) followed by  
348 a CARD and a really interesting new gene (RING) finger domain. SMAC and HTRA2, two  
349 mitochondrial proteins released into the cytosol during apoptosis, use their first four residues (Ala-  
350 Val-Pro-Ile/Ser) called an IAP-binding motif (IBM) to associate with the BIR2 and BIR3 domains  
351 of clAP1 and modulate clAP1 function (Vaux and Silke, 2003). Most notably, SMAC and HTRA2,  
352 as well as small molecule analogs of the IBM, including BV6 and GDC-0152 (Flygare et al., 2012;  
353 Varfolomeev et al., 2007), induce the rapid autoubiquitination and degradation of clAP1. MeBs  
354 similarly induces the ubiquitination and degradation of clAP1 (Sekine et al., 2008), and surface



355 plasmon resonance (SPR), fluorescence polarization, and photoaffinity labeling assays  
356 suggested that MeBs directly interacts with cIAP1. However, *in vitro* binding was only observed  
357 at much higher concentrations (~100  $\mu$ M) than those needed for *in cellulo* cIAP1 degradation (~3  
358  $\mu$ M) (Sato et al., 2008; Sekine et al., 2008). We confirmed that MeBs indeed induces proteasome-  
359 mediated cIAP1 degradation in cells (**Fig. 6A, Fig. S1D, Fig. S5A**). Moreover, we found that the  
360 structurally unrelated AP inhibitors CHR-2797 and batimastat also induced cIAP1 degradation,  
361 suggesting that this response is likely caused by AP inhibition and not direct cIAP1 binding.  
362 Notably, MeBs and batimastat still caused cIAP1 degradation in *SMAC<sup>-/-</sup>/HTRA2<sup>-/-</sup>* cells, and thus  
363 cIAP1 degradation was not simply due to the activation of these endogenous cIAP1 agonists  
364 during apoptosis (**Fig. 6A**).

365 To unbiasedly identify the direct protein targets of MeBs, and in particular to evaluate if  
366 MeBs itself associates with cIAP1, we synthesized a MeBs analog that contains a  
367 photoactivatable diazirine group and a click chemistry compatible alkyne handle to enable  
368 covalent attachment to and enrichment of target proteins (CQ83, **Fig. 6B**). Importantly, CQ83,  
369 like MeBs, enhanced VbP-induced pyroptosis in THP-1 cells (**Fig. 6C**), demonstrating that CQ83  
370 still inhibits the relevant protein targets in cells. We next incubated HEK 293T lysates with CQ83  
371 with or without MeBs, crosslinked CQ83 to target proteins using UV light, coupled CQ83-modified  
372 proteins to biotin using click chemistry, and enriched biotinylated proteins on streptavidin beads.  
373 The enriched proteins were then subjected to on-bead trypsinization, tandem mass tag (TMT)-  
374 labeling, and quantitative protein mass spectrometry analysis (**Fig. S5B**). As expected, we found  
375 that CQ83 selectively enriched several APs, including LTA4H, NPEPPS and CNDP2 (**Fig. 6D,**  
376 **Table S4**), and we confirmed these results by immunoblotting (**Fig. 6E**). In contrast, CQ83 did  
377 not enrich cIAP1 (**Fig. 6D,E**). Consistent with these data, bestatin (and, with differing selectivity,  
378 batimastat), but not BV6 and GDC-0152, stabilized these APs in a cellular thermal shift assay  
379 (CETSA) in HEK 293T cell lysates (**Fig. 6F**). Overall, these data indicate that AP inhibitors do  
380 not directly interact with cIAP1.



381           Instead, we hypothesized that AP inhibition indirectly caused cIAP1 degradation, likely by  
382 stabilizing peptides that interact with the BIR domains. We next tested a diverse panel of  
383 peptidase inhibitors to determine if any others similarly triggered cIAP1 degradation, and we  
384 discovered that only MeBs, CHR-2797, and batimastat induced this effect in MV4;11 cells (**Fig.**  
385 **6G, Fig. S1D**). The SMAC mimetics BV6 and GDC-0152 were used as positive controls in this  
386 experiment. Notably, only these three peptidase inhibitors synergized with VbP to induce more  
387 pyroptosis (**Fig. S5C,D**) (Chui et al., 2019). Thus, inhibition of the same (or similar) APs  
388 accelerates the degradation of cIAP1 and CARD8/NLRP1. However, it remained unclear if cIAP1  
389 degradation was involved in inflammasome activation, or if it was part of a distinct pathway  
390 downstream of AP inhibition.

391           To determine if cIAP1 degradation is involved in the induction of synergistic pyroptosis,  
392 we next evaluated the impact of GDC-0152 on pyroptosis in MV4;11 cells. GDC-0152 did not  
393 induce any GSDMD cleavage on its own, nor did it increase the amount of VbP- or VbP plus  
394 MeBs-induced GSDMD cleavage (**Fig. 6H**). In addition, GDC-0152, unlike MeBs, did not induce  
395 any additional cell death in *CARD8*<sup>-/-</sup> THP-1 cells ectopically expressing CARD8 E274R (**Fig. 6I**).  
396 Thus, cIAP1 degradation does not augment CARD8 inflammasome activation (**Fig. 6J**).  
397 Collectively, these data indicate that AP inhibition induces the accumulation of many cytosolic  
398 peptides, which in turn causes a myriad of biological responses, including N-end rule pathway  
399 blockade, cIAP1 degradation, and CARD8/NLRP1 NT degradation (**Fig. 6J**). In particular, we  
400 hypothesize that the accumulation of peptides with certain destabilizing N-terminal residues block  
401 the N-end rule E3 ligases, those with N-terminal IBM sequences induce the degradation of cIAP1,  
402 and those with distinct (but as yet unknown) sequences accelerate the degradation of NLRP1 and  
403 CARD8. Regardless, the MeBs-induced cIAP1 degradation pathway revealed here provides  
404 more evidence that peptide accumulation triggers several biological responses, even though this  
405 pathway is not involved in regulating NLRP1 and CARD8.

406

## 407 **Other proteotoxic stress inducers trigger synergistic pyroptosis**

408 To more unbiasedly assess the cellular response to MeBs, we next performed RNA  
409 sequencing (RNA-seq) analysis on DMSO- and MeBs-treated *CASP1*<sup>-/-</sup> MV4;11 cells (**Table S5**).  
410 We found that MeBs triggered the upregulation of several genes involved in the response to  
411 damaged or misfolded protein accumulation, or proteotoxic stress, including *ATF4*, *ATF5*, *TXNIP*,  
412 *TRIB3*, *DDIT4*, *ADM2*, *CHAC1*, *SESN2* (**Fig. 7A**) (Kovaleva et al., 2016; Mungrue et al., 2009;  
413 Pakos-Zebrucka et al., 2016; Yang et al., 2021). We confirmed the upregulation of several of  
414 these transcripts using quantitative PCR (qPCR) (**Fig. 7B**). It is well-established that peptides  
415 interfere with chaperone-mediated protein folding (Li et al., 2003; Otvos et al., 2000). Thus, we  
416 reasoned that accumulation of proteasome-generated peptides, and especially those with  
417 hydrophobic sequences, interfere with protein folding and thereby induce genes involved in  
418 proteotoxic stress. In addition to these genes, we found that MeBs upregulated the transcription  
419 of several genes encoding amino acid transporters, including *SLC38A2*, *SLC7A5*, and *SLC3A2*  
420 (**Fig. 7A, Table S5**). These results suggest that MeBs does cause some amino acid starvation,  
421 even it does not appreciably impact the overall amino acid levels (**Fig. 4C**). Notably, a previous  
422 study found that CHR-2797 induced a very similar transcriptional changes (Krige et al., 2008),  
423 indicating that these responses are indeed due to AP inhibition.

424 We next wondered if other well-characterized agents that interfere with protein folding,  
425 including brefeldin A (BFA) and geldanamycin (GA), might similarly accelerate NLRP1 and  
426 CARD8 NT degradation. BFA inhibits protein export from the endoplasmic reticulum and thereby  
427 induces the unfolded protein response (UPR) (Citterio et al., 2008; Fujiwara et al., 1988; Helms  
428 and Rothman, 1992). GA inhibits the ATPase activity of heat-shock protein 90 (HSP90) and  
429 thereby destabilizes HSP90 client proteins (Neckers et al., 1999a; Neckers et al., 1999b).  
430 Notably, BFA upregulated the transcription of several of the same proteotoxic stress response  
431 genes as MeBs, including *ATF4*, *ATF5*, *TRIB4*, and *DDIT4* (**Fig. 7A,B, Table S5**), indicating at  
432 least some similarities between stresses caused these agents. However, GA did not appreciably

433 alter mRNA transcript levels of these genes (**Fig. 7B**). Consistent with our hypothesis, we  
434 discovered that BFA, like MeBs, strongly synergized with VbP to induce more pyroptosis in  
435 MV4;11, THP-1, RAW 264.7, and OCI-AML2 cells (**Fig. 7C-E, Fig. S6A**), although it did not induce  
436 the release of significantly more IL-1 $\beta$  in N/TERT-1 keratinocytes (**Fig. S6B**). We also observed  
437 that GA had at least some synergy with VbP in MV4;11, RAW 264.7 cells, and N/TERT-1  
438 keratinocytes, albeit not in THP-1 cells (**Fig. 7C-E, Fig. S6B**). It is not clear why BFA and GA do  
439 not synergize with VbP in N/TERT-1 keratinocytes and THP-1 cells, respectively, but we  
440 speculate it could be due to different proteostasis networks in the cell types.

441 As expected, both BFA- and GA-induced synergistic pyroptosis in MV4;11 was  
442 proteasome degradation-dependent, as bortezomib completely abolished this pyroptotic death  
443 (**Fig. 7F**). Moreover, BFA and GA induced more proteasome-dependent pyroptosis in *CARD8*<sup>-/-</sup>  
444 MV4;11 cells ectopically expressing the DPP9 non-binding *CARD8* E274R mutant protein (**Fig.**  
445 **7G, Fig. S6C**). Similarly, BFA induced more GSDMD cleavage in both *DPP8/9*<sup>-/-</sup> THP-1 cells  
446 and THP-1 cells expressing *CARD8* E274R (**Fig. 7H, Fig. S6D**). In addition, both BFA and GA  
447 synergized with CQ31 to induce more pyroptosis in MV4;11 cells (**Fig. 7I**). Notably, we found that  
448 GA and BFA, unlike MeBs, did not induce cIAP1 degradation, consistent with their mechanisms  
449 not involving the stabilization of peptides (**Fig. 7J**). Despite these distinct mechanisms of action,  
450 however, it should be noted that the combination of MeBs, GA, and BFA did not induce pyroptosis  
451 without a DPP8/9-binding ligand (**Fig. 7I, S6E**). Overall, these data show that BFA and GA, like  
452 MeBs, accelerate NLRP1 and *CARD8* NT degradation, but do not alone induce inflammasome  
453 activation because the DPP8/9 complexes sequester the freed CT fragments.

454 We next wanted to test the impact of BFA and GA on inflammasome activation by other  
455 stimuli. We found that BFA and GA did not impact LT-induced NLRP1B-dependent pyroptosis,  
456 imiquimod-induced NLRP3-dependent pyroptosis, nor nigericin-induced NLRP3-dependent  
457 pyroptosis in RAW 264.7 cells stably expressing ASC (RAW 264.7 cells do not endogenously

458 express ASC, which is required for NLRP3 inflammasome formation) (**Fig. 7K**). These results  
459 confirm that these proteotoxic drugs do not non-specifically increase pyroptosis induced by all  
460 inflammasome triggers.

461 As translation is a major source of unfolded proteins, we next evaluated the impact of the  
462 translation inhibitor cycloheximide (CHX) on this pyroptotic pathway. As expected, CHX, but not  
463 VbP, MeBs, batimastat, GA, or BFA, greatly slowed the overall translation rate in HEK 293T cells,  
464 as measured by puromycin incorporation into nascent polypeptides (**Fig. S6F**.) Intriguingly, we  
465 found that CHX attenuated VbP and VbP plus MeBs-induced pyroptosis in MV4;11 cells (**Fig.**  
466 **S6G, H**), MeBs-induced pyroptosis in *PEPD*<sup>-/-</sup> THP-1 cells (**Fig. S2D**), as well as VbP-induced  
467 pyroptosis in primary rat and mouse macrophages (**Fig. S6I,J**). In addition, we found that CHX  
468 also rescued BFA- and GA-induced synergistic pyroptosis with VbP in MV4;11 cells (**Fig S6K**).  
469 We hypothesize that CHX reduces the amount of unfolded polypeptides in the cell, thereby  
470 reducing the overall burden for the chaperone machinery. However, translation blockade could  
471 obviously block pyroptosis via a variety of other mechanisms as well, for example by inhibiting  
472 the synthesis of proteins involved in the pyroptotic pathway. Nevertheless, these data collectively  
473 indicate that agents that interfere with protein folding, including peptides, accelerate the  
474 degradation of the NLRP1 and CARD8 NT fragments.

475

## 476 **DISCUSSION**

477 The biological purposes of the NLRP1 and CARD8 inflammasomes have not yet been  
478 established (Bachovchin, 2021). Notably, NLRP1 is highly polymorphic, and an array of dissimilar  
479 pathogen-associated stimuli, including viral proteases and dsRNA, induce its activation in  
480 experimental systems (Hornung et al., 2009; Robinson et al., 2020; Tsu et al., 2020). Curiously,  
481 however, none of these stimuli universally activate all functional NLRP1 alleles in rodents and  
482 humans. Based on these findings, some have hypothesized that NLRP1 is rapidly evolving to  
483 detect distinct danger signals and does not have a single primordial function. Alternatively, we

484 have proposed that both NLRP1 and CARD8 evolved to detect, albeit with different thresholds, a  
485 single unknown danger state that is linked in some way to DPP8/9 (**Fig. 1D**) (Bachovchin, 2021;  
486 Chui et al., 2020). Here, we now show NLRP1 and CARD8 detect protein misfolding that is  
487 associated with peptide accumulation (**Fig. S7A**).

488 NLRP1 and CARD8 sense the stability of their NT fragments to proteasome-mediated  
489 degradation, but the cellular factors that regulate this stability are poorly understood. In this  
490 Article, we demonstrate that several distinct and well-characterized small molecules, including  
491 MeBs, BFA, and GA, accelerate the rate of NT degradation. Notably, MeBs, BFA, and GA  
492 stabilize oligopeptides, block protein export, and interfere with chaperone function, respectively,  
493 and therefore act via different molecular mechanisms. Nevertheless, all three agents interfere  
494 with protein folding, thereby destabilizing the NT fragments (**Fig. S7A**). It should be noted that,  
495 even though these proteotoxic drugs accelerate NT degradation, they do not cause  
496 inflammasome activation on their own because the DPP8/9 ternary complex quenches the  
497 released CT fragments; a DPP8/9-binding ligand (e.g., VbP or an XP-containing peptide) is  
498 needed to destabilize the ternary complex and enable inflammasome assembly to proceed. We  
499 hypothesize that imposing even greater proteotoxic stress, for example by combining these drugs  
500 with an agent that impacts protein folding in a different way, might trigger inflammasome activation  
501 without having to simultaneously add an exogenous DPP8/9 inhibitor. On that note, we recently  
502 discovered that reductive stress appears to contribute to NLRP1 inflammasome activation (Ball  
503 et al., 2021), and we speculate that certain antioxidants might interfere with protein folding by  
504 such a distinct mechanism (Tu and Weissman, 2004; Wang et al., 2022).

505 We should emphasize that our results here, coupled with our previous work (Rao et al.,  
506 2022), show that peptides play important roles in controlling NLRP1 and CARD8 activation both  
507 upstream and downstream of the proteasome (**Fig. 1D, Fig. S7A**). As described in this  
508 manuscript, a large and diverse array of (likely hydrophobic) peptides, which are stabilized by  
509 MeBs (and probably to lesser extent by VbP and CQ31), accelerate the rate of NT degradation

510 **(Fig. S7A)**. Peptides with N-terminal XP sequences, which are stabilized by CQ31 and VbP but  
511 not MeBs, disrupt the DPP8/9-containing repressive ternary complex. Moreover, VbP itself  
512 essentially mimics an extremely high concentration of XP peptides. Thus, we propose that the  
513 overall intracellular peptide pool increases NT degradation, and that DPP8/9 sense XP peptide  
514 levels as a checkpoint to verify that NT degradation is indeed associated with peptide build-up. A  
515 possible reason that XP-containing peptides are monitored is discussed below. It should be noted  
516 that XP peptides (i.e., CQ31-stabilized peptides) alone are sufficient to activate CARD8, but that  
517 a large set of peptides including XP-containing peptides (i.e., both MeBs- and CQ31-stabilized  
518 peptides) are required to activate NLRP1 **(Fig. 2I)**. These data are consistent with the idea that  
519 NLRP1 is more inflammatory than CARD8 and therefore has a higher threshold for activation  
520 (Bachovchin, 2021; Ball et al., 2020).

521         Projecting forward, at least two questions remain unanswered: 1) Why does the  
522 impairment of protein folding accelerate the degradation of the NT fragments, and 2) why are XP  
523 peptides so important? Regarding the first question, we hypothesize that unfolded polypeptides  
524 interfere with the initial folding of nascent NLRP1/CARD8 protein and/or unravel already folded  
525 NLRP1/CARD8. As the proteasome rapidly destroys misfolded proteins (Baugh et al., 2009; Liu  
526 et al., 2003), this would lead to their rapid degradation. If correct, it seems likely the polymorphic  
527 and disordered NT regions exist to modulate the propensity of the ZU5 domains to misfold (Chui  
528 et al., 2020; Waldo et al., 1999). Regarding the second question, we speculate that XP-  
529 containing peptides might serve as an early warning sign of impending proteostasis failure.  
530 Briefly, defective protein folding will cause many newly misfolded proteins to be degraded by the  
531 proteasome, thereby generating peptides. If these peptides are so abundant that they overwhelm  
532 the ability of APs to destroy them, they may then initiate a disastrous feedforward cycle, in which  
533 the peptides in turn interfere with protein folding, generate more peptides, and so on, ultimately  
534 leading to proteostasis failure **(Fig. S7B)**. XP-containing peptides are especially challenging to

535 cleave due to their conformationally restricted proline bond, and thus might accumulate first and  
536 serve as a harbinger of catastrophe.

537 Finally, we should note that NLRP1 (and possibly the CARD8) did not evolve to sense  
538 small molecules that interfere with proteostasis, but rather the presence of infectious pathogens.  
539 Nevertheless, this work showcases the utility of fast acting and selective chemical probes for  
540 deconvoluting complex immunological pathways. We anticipate that the development of  
541 additional chemical tools, likely including ones that induce reductive stress (Wang et al., 2022),  
542 will enable further delineation of molecular mechanisms that regulate NLRP1 and CARD8  
543 activation and ultimately help illuminate their relationship with infectious agents. On that note, the  
544 polymorphic rodent NLRP1 alleles appear to have similar relative sensitivities to *Toxoplasma*  
545 *gondii* (*T. gondii*) infection and VbP (Cirelli et al., 2014; Ewald et al., 2014; Gai et al., 2019), and  
546 we therefore speculate that *T. gondii* may compromise protein folding through as yet unknown  
547 mechanisms. We expect that future studies with *T. gondii* and potentially other pathogens,  
548 coupled with the use of high-quality chemical probes, will reveal the full biological purpose of  
549 these enigmatic inflammasomes.

550

551

## 552 **Acknowledgements**

553 This work was supported by the NIH (R01 AI137168, R01 AI163170, and R01 CA266478 to  
554 D.A.B.; T32 GM007739-Andersen to A.R.G; NIH T32 GM115327-Tan to E.L.O.-H.; F30  
555 CA008748 to A.R.G.; the MSKCC Core Grant P30 CA008748), Gabrielle's Angel Foundation  
556 (D.A.B.), Mr. William H and Mrs. Alice Goodwin, the Commonwealth Foundation for Cancer  
557 Research, and The Center for Experimental Therapeutics of Memorial Sloan Kettering Cancer  
558 Center (D.A.B.), the Emerson Collective (D.A.B.), and the Marie-Josée Kravitz Women in Science  
559 Endeavor (WISE) fellowship (SDR).

560



561 **Author Contributions**

562 D.A.B. conceived and directed the project. E.L.O.-H., H.-C.H., S.D.R., Q.W., Q.C., C.M.O., A.J.C.,  
563 A.R.G., A.B., and D.P.B. performed cloning, gene editing, biochemistry, and cell biology  
564 experiments. Q.C. synthesized CQ83 and performed chemoproteomics experiments and  
565 validation. E.L.O.-H., H.-C.H., J.R.C., and M.S. performed and analyzed metabolomics  
566 experiments. D.A.B., E.L.O.-H., and H.-C.H. wrote the manuscript.

567

568

569 **Materials and Methods**

570 **METHOD DETAILS**

| REAGENT or RESOURCE                            | SOURCE              | IDENTIFIER |
|------------------------------------------------|---------------------|------------|
| <b>Antibodies</b>                              |                     |            |
| GSDMD Rabbit polyclonal Ab                     | Novus Biologicals   | NBP2-33422 |
| CARD8 rabbit polyclonal Ab                     | Abcam               | ab24186    |
| cleaved N-terminal GSDMD Rabbit monoclonal Ab  | Abcam               | ab215203   |
| NLRP1 sheep polyclonal Ab                      | R&D Systems         | AF-6788    |
| PARP rabbit polyclonal Ab                      | Cell Signaling Tech | 9542       |
| GAPDH rabbit monoclonal Ab                     | Cell Signaling Tech | 14C10      |
| mouse GSDMD rabbit monoclonal Ab               | Abcam               | ab209845   |
| PEPD rabbit monoclonal Ab                      | Abcam               | ab197890   |
| XPNPEP1 mouse monoclonal Ab                    | Abcam               | ab123929   |
| phospho(Thr389)-p70-S6K rabbit monoclonal Ab   | Cell Signaling Tech | 9234       |
| p70-S6K rabbit monoclonal Ab                   | Cell Signaling Tech | 2708       |
| phospho-(Thr37/46)-4E-BP1 rabbit monoclonal Ab | Cell Signaling Tech | 2855       |
| phospho-(Thr37/46)-4E-BP1 rabbit monoclonal Ab | Cell Signaling Tech | 2855       |
| 4E-BP1 rabbit monoclonal Ab                    | Cell Signaling Tech | 9644       |
| phospho-eIF2a rabbit polyclonal Ab             | Cell Signaling Tech | 9721       |
| eIF2a rabbit polyclonal Ab                     | Cell Signaling Tech | 9722       |
| NPEPPS rabbit polyclonal Ab                    | Abcam               | ab96066    |
| METAP2 sheep polyclonal Ab                     | R&D Systems         | AF-3795-SP |
| CNDP2 sheep polyclonal Ab                      | R&D Systems         | AF3560     |
| LTA4H [sheep polyclonal Ab                     | R&D Systems         | AF4008     |
| SMAC rabbit monoclonal Ab                      | Cell Signaling Tech | 15108      |
| HTRA2 rabbit polyclonal Ab                     | Millipore Sigma     | HPA027366  |
| clAP1 goat polyclonal Ab                       | R&D Systems         | AF8181     |
| puromycin mouse monoclonal Ab                  | Millipore Sigma     | MABE343    |
| IRDye 800CW anti-rabbit                        | LICOR               | 926-32213  |
| IRDye 800CW anti-goat                          | LICOR               | 925-32214  |



|                                                      |                             |             |
|------------------------------------------------------|-----------------------------|-------------|
| IRDye 800CW anti-mouse                               | LICOR                       | 926-32212   |
| IRDye 680CW anti-mouse                               | LICOR                       | 926-68072   |
| IRDye 680CW anti-rabbit                              | LICOR                       | 925-68073   |
| <b>Chemicals, peptides, and recombinant proteins</b> |                             |             |
| Val-boroPro (VbP)                                    | Tocris                      | 3719        |
| compound 8j (8j)                                     | Okondo <i>et al.</i> , 2017 | N/A         |
| Bortezomib (Bort.)                                   | Millipore Sigma             | 504314      |
| Bestatin methyl ester (MeBs)                         | Millipore Sigma             | 200485      |
| Batimastat (Batim.)                                  | Tocris                      | 2691        |
| CHR-2797                                             | Tocris                      | 3595        |
| CQ31                                                 | Rao <i>et al.</i> 2022      | N/A         |
| dTAG-13                                              | R&D Systems                 | 6605/5      |
| Val-Pro-OMe (VP-OMe)                                 | Rao <i>et al.</i> , 2022    | N/A         |
| MG132                                                | Calbiochem                  | 474787      |
| VX765                                                | Cayman                      | 28825       |
| Torin1                                               | Thermo Fisher Scientific    | 4247        |
| BV6                                                  | ApexBio                     | B4653       |
| GDC-0152                                             | Selleck                     | S7010       |
| Actinonin                                            | Enzo                        | ALX-260-128 |
| Apstatin                                             | SCBT                        | sc-201309   |
| Amastatin                                            | Millipore-Sigma             | A1276       |
| SC57461A                                             | Tocris                      | 3107        |
| HFI142                                               | R&D Systems                 | 5627        |
| Fumagillin                                           | ApexBio                     | A4407       |
| 1,10-phenathroline                                   | Millipore-Sigma             | 131377      |
| Captopril                                            | R&D Systems                 | 4455        |
| Sitagliptin                                          | Thermo Fisher Scientific    | 11-101-5083 |
| Compound 5385 (5385)                                 | Okondo <i>et al.</i> , 2017 | N/A         |
| Z-prolyl prolinal                                    | Millipore-Sigma             | SML0205     |
| S17092                                               | Millipore-Sigma             | SML0181     |
| Butabindide Oxalate                                  | Thermo Fisher Scientific    | 1323/10     |
| Geldenamycin (GA)                                    | SCBT                        | sc-200617A  |
| Brefeldin A (BFA)                                    | BioLegend                   | 42060       |
| lipopolyaccharide (LPS)                              | Invivogen                   | tlrl-3pelps |
| Nigericin                                            | Cayman                      | 11437       |
| Cycloheximide (CHX)                                  | Millipore-Sigma             | C7698       |
| Puromycin (Puro)                                     | Millipore-Sigma             | P7255       |
| Ala-Pro-7-amino-4-methylcoumarin (AP-AMC)            | MP Biomedicals              | 03AMC04210  |
| Ala-7-amino-4-methylcoumarin (A-AMC; Sigma)          | Millipore-Sigma             | A4302       |
| Leu-7-amino-4-methylcoumarin (L-AMC)                 | SCBT                        | sc-218643   |
| Doxycycline (DOX)                                    | Cayman                      | 14422       |
| FuGENE HD                                            | Promega                     | E2311       |

| <b>Critical commercial assays</b>                                |                      |                                      |
|------------------------------------------------------------------|----------------------|--------------------------------------|
| Pierce LDH Cytotoxicity Assay Kit                                | Life Technologies    | PI88953                              |
| DCA Protein Assay kit                                            | Bio-Rad              | 5000111                              |
| IL-1 $\beta$ ELISA Assay                                         | R&D systems          |                                      |
| CellTiter-Glo Cell Viability Assay                               | Promega              | G7573                                |
| CytoTox-Fluor cytotoxicity Assay                                 | Promega              | G9262                                |
| MycoAlert Mycoplasma Detection Kit                               | Lonza                | LT07-318                             |
| <b>Deposited data</b>                                            |                      |                                      |
| TMT proteomics raw data                                          | This Study           | ProteomeXchange<br>(to be deposited) |
| RNA-seq raw data                                                 | This Study           | GEO ID<br>(to be deposited)          |
| <b>Experimental models: Cell lines</b>                           |                      |                                      |
| HEK293T                                                          | ATCC                 | CRL-3216                             |
| HEK293T + CASP1 + GSDMD                                          | Johnson et al., 2018 | N/A                                  |
| HEK293T <i>PEPD</i> <sup>-/-</sup>                               | This Study           | N/A                                  |
| HEK293T <i>DPP9</i> <sup>-/-</sup>                               | This Study           | N/A                                  |
| THP-1                                                            | ATCC                 | TIB-202                              |
| THP-1 <i>CARD8</i> <sup>-/-</sup>                                | Johnson et al., 2018 | N/A                                  |
| THP-1 <i>DPP8</i> <sup>-/-</sup> / <i>DPP9</i> <sup>-/-</sup>    | Okondo et al., 2017  | N/A                                  |
| THP-1 <i>PEPD</i> <sup>-/-</sup>                                 | Rao et al., 2022     | N/A                                  |
| THP-1 <i>XPNPEP1</i> <sup>-/-</sup>                              | Rao et al., 2022     | N/A                                  |
| THP-1 <i>PEPD</i> <sup>-/-</sup> / <i>XPNPEP1</i> <sup>-/-</sup> | Rao et al., 2022     | N/A                                  |
| THP-1 <i>CARD8</i> <sup>-/-</sup> + pInducer20-CARD8-WT          | Sharif et al., 2021  | N/A                                  |
| THP-1 <i>CARD8</i> <sup>-/-</sup> + pInducer20-CARD8-E274R       | Sharif et al., 2021  | N/A                                  |
| THP-1 <i>CARD8</i> <sup>-/-</sup> + pInducer20-CARD8-S297A       | Sharif et al., 2021  | N/A                                  |
| THP-1 <i>CARD8</i> <sup>-/-</sup> + pInducer20-NLRP1-WT          | This Study           | N/A                                  |
| THP-1 <i>CARD8</i> <sup>-/-</sup> + pInducer20-NLRP1-S1213A      | This Study           | N/A                                  |
| THP-1 <i>CARD8</i> <sup>-/-</sup> + pInducer20-NLRP1-P1214R      | This Study           | N/A                                  |
| THP-1 <i>CARD8</i> <sup>-/-</sup> + pInducer20-NLRP1-LL1193EE    | This Study           | N/A                                  |
| THP-1 <i>SMAC</i> <sup>-/-</sup> / <i>IHTRA2</i> <sup>-/-</sup>  | This Study           | N/A                                  |
| RAW 264.7                                                        | ATCC                 | TIB-71                               |
| RAW 264.7 + ASC                                                  | This study           | N/A                                  |
| RAW 264.7 <i>CASP1</i> <sup>-/-</sup>                            | Okondo et al., 2017  | N/A                                  |
| MV4;11                                                           | DSMZ                 | ACC 102                              |
| MV4;11 <i>CARD8</i> <sup>-/-</sup>                               | Johnson et al., 2018 | N/A                                  |
| MV4;11 <i>CASP1</i> <sup>-/-</sup>                               | Johnson et al., 2018 | N/A                                  |
| MV4;11 <i>PEPD</i> <sup>-/-</sup>                                | Rao et al., 2022     | N/A                                  |
| MV4;11 <i>CARD8</i> <sup>-/-</sup> + pInducer20-CARD8-E274R      | This Study           | N/A                                  |
| OCI-AML2                                                         | DSMZ                 | ACC 99                               |
| J774A.1 (J774.1)                                                 | ATCC                 | TIB-67                               |
| N/TERT-1                                                         | Dickson et al., 2000 | N/A                                  |

|                                               |                            |                        |
|-----------------------------------------------|----------------------------|------------------------|
| N/TERT-1 <i>NLRP1</i> <sup>-/-</sup>          | Ball et al., 2021          | N/A                    |
| Naive human CD3 T cells                       | HemaCare                   | Lot#21068415           |
| <b>Experimental models: Organisms/strains</b> |                            |                        |
| C57BL/6 mice (harvested BMDMs)                | The Jackson Laboratory     | N/A                    |
| Sprague Dawley rats (harvested BMDMs)         | Charles River Laboratories | N/A                    |
| Lewis Rats (harvested BMDMs)                  | Charles River Laboratories | N/A                    |
| <b>Oligonucleotides</b>                       |                            |                        |
| sgDPP8: 5'- ATGATTTTCATGTTTGTGAAG -3'         | Okondo et al., 2017        | N/A                    |
| sgDPP9: 5'- GGCCAACATCGAGACAGGCG -3'          | Okondo et al., 2017        | N/A                    |
| sgCARD8 5'- TGACGATTGCGTTTGGTTCC -3'          | Johnson et al., 2018       | N/A                    |
| sgPEPD-1: 5'- CATGGCACCCATGACGGCAC -3'        | Rao et al., 2022           | N/A                    |
| sgPEPD-2: 5'- ACTCACCGCCCATGTCTGAAC -3'       | Rao et al., 2022           | N/A                    |
| sgXPNPEP1: 5'-GATGTAGGCCTGGATCGGTT -3'        | Rao et al., 2022           | N/A                    |
| sgSMAC: 5'- ACCAACTGCAGTCATCCAAG -3'          | This Study                 | N/A                    |
| sgHTRA2: 5'- ACTCTCGAAGACGATCAGAA-3'          | This Study                 | N/A                    |
| sgNLRP1: 5'- ATACTGAGCCACCAGGTACG -3'         | IDT                        | Hs.Cas9.NLRP1.1.A<br>C |
| sgCASP1-hu: 5'- CTAAACAGACAAGGTCCTGA -3'      | Johnson et al., 2018       | N/A                    |
| sgCASP1-mu: 5'- TTAAACAGACAAGATCCTGA -3'      | Okondo et al., 2017        | N/A                    |
| qPCR-CHAC1-F: 5'- GAAGATCATGAGGGCTGCAC -3'    | This Study                 | N/A                    |
| qPCR-CHAC1-R: 5'- TTGGTCAGGAGCATCTTGGG-3'     | This Study                 | N/A                    |
| qPCR-DDIT3-F: 5'- GCAGCTGAGTCATTGCCTTT -3'    | This Study                 | N/A                    |
| qPCR-DDIT3-R: 5'- CAGTCAGCCAAGCCAGAGAA -3'    | This Study                 | N/A                    |
| qPCR-DDIT4-F: 5'- TCGTCGTCCACCTCCTCTTC -3'    | This Study                 | N/A                    |
| qPCR-DDIT4-R: 5'- GGTAAGCCGTGTCTTCCTCC -3'    | This Study                 | N/A                    |
| qPCR-SESN2-F: 5'- GTTGAACAACCTCTGGGGGCT -3'   | This Study                 | N/A                    |
| qPCR-SESN2-R: 5'- GCAGGCTCTCTGACTTCTCC -3'    | This Study                 | N/A                    |
| qPCR-TRIB3-F: 5'- TGACCGTGAGAGGAAGAAGC -3'    | This Study                 | N/A                    |
| qPCR-TRIB3-R: 5'- CTGCCTTGCCCGAGTATGAG -3'    | This Study                 | N/A                    |
| qPCR-GAPDH-F: 5'- CAATGACCCCTTCATTGACC -3'    | Common reagent             | N/A                    |
| qPCR-GAPDH-R: 5'- GATCTCGCTCCTGGAAGATG -3'    | Common reagent             | N/A                    |
| <b>Recombinant DNA</b>                        |                            |                        |
| pLEX_307                                      | Gift from David Root       | Addgene #41392         |
| pLEX307 V5-GFP-ASC-FLAG                       | Ball et al., 2020          | N/A                    |
| pLEX307 NLRP1-FLAG                            | Johnson et al., 2018       | N/A                    |
| pInducer20 CARD8-HA PAM E274R                 | Sharif et al., 2021        | Addgene #169984        |
| pInducr20 CARD80-HA PAM                       | Sharif et al., 2021        | Addgene # 169982       |
| pInducr20 CARD8 PAM S297A                     | Sharif et al., 2021        | Addgene # 169983       |
| pLEX307_CARD8_FIIND_S297A_FLAG                | Sharif et al., 2021        | N/A                    |
| pLEX305-N-dTAG-CARD8-ZUC                      | Sharif et al., 2021        | Addgene #169990        |
| pLEX_307 CASP1 Stop                           | Johnson et al., 2018       | N/A                    |
| pLEX_307 GSDMD-I104N V5                       | This Study                 | N/A                    |
| pLEX_307 CARD8 FLAG                           | Johnson et al., 2018       | N/A                    |
| pLEX_307 mASC_hygro                           | This study                 | N/A                    |

| Software and algorithms  |                      |     |
|--------------------------|----------------------|-----|
| GraphPad Prism Version 9 | GraphPad Software    | N/A |
| ImageJ                   | NIH                  | N/A |
| MaxQuant v1.6.17.0       | Agilent Technologies | N/A |
| SIRIUS                   | Duhrkop et al., 2019 | N/A |
| MassHunter Profinder     | Agilent Technologies | N/A |
| ImageStudio              | Li-Cor Biosciences   | N/A |

571

## 572 Cell Culture

573 HEK 293T, THP-1, J774.1 and RAW 264.7 cells were purchased from ATCC. OCI-AML2 and  
574 MV4;11 cells were purchased from DSMZ. Naïve CD3 human T cells were purchased from  
575 HemaCare (Lot #21068415). N/TERT-1 cells were a gift from the Rheinwald Lab (Dickson et al.,  
576 2000). HEK 293T, RAW 264.7 and J774.1 cells were grown in Dulbecco's Modified Eagle's  
577 Medium (DMEM) with L-glutamine and 10% fetal bovine serum (FBS). Naïve human CD3 T cells,  
578 THP-1, MV4;11, and OCI-AML2 cells were grown in Roswell Park Memorial Institute (RPMI)  
579 medium 1640 with L-glutamine and 10% FBS. N/TERT-1 cells were grown in Keratinocyte serum  
580 free medium (KSFM) supplemented with 1X penicillin/streptomycin, bovine pituitary extract (25  
581 µg/ml) and epidermal growth factor (EGF) (0.2 ng/mL). All cells were grown at 37°C in a 5%  
582 CO<sub>2</sub> atmosphere incubator. Cell lines were regularly tested for mycoplasma using the MycoAlert  
583 Mycoplasma Detection Kit (Lonza). *CARD8*<sup>-/-</sup>, *DPP8*<sup>-/-</sup>/*IDPP9*<sup>-/-</sup>, *PEPD*<sup>-/-</sup>, *PEPD*<sup>-/-</sup>/*XPNPEP1*<sup>-/-</sup>,  
584 and *XPNPEP1*<sup>-/-</sup> THP-1 cells, *CASP1*<sup>-/-</sup> RAW 264.7 cells, *CARD8*<sup>-/-</sup>, *PEPD*<sup>-/-</sup>, and *CASP1*<sup>-/-</sup>  
585 MV4;11 and *NLRP1*<sup>-/-</sup> N/TERT-1 cells were generated as previously described (Ball et al., 2021;  
586 Johnson et al., 2018; Okondo et al., 2017). Doxycycline (DOX)-inducible *CARD8* and *NLRP1* WT  
587 and mutant knock-in *CARD8*<sup>-/-</sup> THP-1 were generated as previously described (Hollingsworth et  
588 al., 2021; Sharif et al., 2021), and DOX-inducible *CARD8* knock-ins to *CARD8*<sup>-/-</sup> MV4;11 cells  
589 were similarly generated for this study. Briefly, *CARD8*<sup>-/-</sup> MV4;11 cells were infected with the  
590 indicated lentivirus containing pInducer20 construct, followed by selection with G418 (Geneticin)  
591 at 400 µg/mL until all control cells were dead (approximately 14 days).

592

593 **Cloning.**

594 Plasmids for CARD8 WT and variants, CASP1, GSDMD, NLRP1 WT and variants, ASC-GFP,  
595 dTAG-CARD8<sup>ZUC</sup> were cloned as described previously (Hollingsworth et al., 2021; Johnson et al.,  
596 2018; Sharif et al., 2021). Briefly, DNA sequences encoding the genes were purchased from  
597 GenScript, amplified by polymerase chain reaction (PCR), shuttled into the Gateway cloning  
598 system (ThermoFisher Scientific) using pDONR221 and pLEX307 vectors originating from  
599 pLEX307 (Addgene #41392). sgRNAs were designed using the Broad Institute's web portal  
600 (Doench et al., 2016) (<http://www.broadinstitute.org/rnai/public/analysis-tools/sgrna-design>) and  
601 cloned into the lentiGuide-puro vector (Addgene #52963) as described previously (Sanjana et al.,  
602 2014). The sgRNA sequences used are described in the STAR Methods table.

603

604 **CellTiter-Glo cell viability and CytoTox-Fluor cell death assays.** Cells were plated (2,000 cells  
605 per well) in white, 384-well clear-bottom plates (Corning) using an EL406 Microplate  
606 Washer/Dispenser (BioTek) in 25  $\mu$ L final volume of medium. To the cell plates were added  
607 compounds at different concentrations using a pin tool (CyBio) and the plates were allowed to  
608 incubate for 1 h in the incubator before adding VbP (10  $\mu$ M). After incubation for indicated times,  
609 CytoTox-Fluor reagent (Promega, G9262) was added according to the manufacturer's protocol.  
610 The assay plates were then incubated for another 30 min before fluorescence was recorded using  
611 a Cytation 5 Cell Imaging Multi-Mode Reader (BioTek). Next, CellTiter-Glo reagent (Promega,  
612 G7573) was subsequently added to the assay plates following the manufacturer's protocol. Assay  
613 plates were shaken on an orbital shaker for 2 min and incubated at 25 °C for 10 min.  
614 Luminescence was then read using a Cytation 5 Cell Imaging Multi-Mode Reader (BioTek).

615

616 **LDH cytotoxicity assays.** HEK 293T cells were transiently transfected and treated with inhibitors  
617 as indicated. MV4;11, THP-1, OCI-AML2, RAW 264.7 or J774.1 cells were plated in 12-well

618 culture plates at  $5 \times 10^5$  cells/well, Naïve human CD3 T cells were plated in 12-well tissue culture  
619 plates at  $2 \times 10^6$  cells/well, and N/TERT-1 cells were plated at  $2 \times 10^5$  cells/well and treated with  
620 chemical compounds as indicated. Supernatants were analyzed for LDH activity using the Pierce  
621 LDH Cytotoxicity Assay Kit (Life Technologies). LDH activity was quantified relative to a lysis  
622 control where cells were lysed by adding 8  $\mu$ L of a 9% Triton X-100 solution.

623  
624 **Immunoblotting.** Cells were washed  $2 \times$  in PBS (pH = 7.4), resuspended in PBS, and lysed by  
625 sonication. Protein concentrations were determined and normalized using the DCA Protein Assay  
626 kit (Bio-Rad). Samples were run on NuPAGE 4 to 12%, Bis-Tris, 1.0 mm, Midi Protein Gel  
627 (Invitrogen) for 45–60 min at 175 V. Gels were transferred to nitrocellulose with the Trans-Blot  
628 Turbo Transfer System (Bio-Rad). Membranes were blocked with Intercept (TBS) Blocking Buffer  
629 (LI-COR) for 30 min at ambient temperature, before incubating with primary antibody overnight at  
630 4 °C. Blots were washed 3 times with TBST buffer before incubating with secondary antibody for  
631 60 min at ambient temperature. Blots were washed 3 times, rinsed with water and imaged via  
632 Odyssey CLx (LI-COR). Antibodies are listed in the Key Resources Table.

633  
634 **CRISPR/Cas9 gene editing.** *DPP8/9*, *CARD8*, *PEPD*, *XPNPEP1*, and *PEPD/XPNPEP1*  
635 knockout THP-1 cell lines and all HEK 293T, RAW 264.7, N/TERT-1 and MV4;11 knockout cell  
636 lines were generated as previously described (Ball et al., 2021; Johnson et al., 2018; Okondo et  
637 al., 2017; Rao et al., 2022; Sharif et al., 2021). Briefly,  $5 \times 10^5$  HEK 293T cells stably expressing  
638 Cas9 were seeded in 6-well tissue culture dishes in 2 mL of media per well. The next day cells  
639 were transfected according to manufacturer's instructions (FuGENE HD, Promega) with 2  $\mu$ g of  
640 the sgRNA plasmid(s). After 48 h, cells were transferred to a 10 cm tissue culture dish and  
641 selected with puromycin (1  $\mu$ g/mL) until control cells were all dead. Single cell clones were  
642 isolated by serial dilution and confirmed by Western blot or sequencing, as indicated. To generate

643 knockouts in RAW 264.7, MV4;11 and THP-1 cells,  $1.5 \times 10^6$  cells stably expressing Cas9  
644 (Johnson et al., 2018) were infected with lentivirus containing sgRNA plasmids. After 48 h, cells  
645 were selected with puromycin (1  $\mu\text{g}/\text{mL}$ ) or hygromycin (100  $\mu\text{g}/\text{mL}$ ). Single cell clones were  
646 isolated by serial dilution and confirmed by Western blotting. *NLRP1* knockout N/TERT-1  
647 keratinocytes were prepared by using the Neon Transfection System (ThermoFisher Scientific)  
648 following the manufacturer's recommendations to deliver Cas9 ribonucleoprotein complexes  
649 containing an Alt-R CRISPR-Cas9 sgRNA and recombinant Cas9 (IDT). Briefly, sgRNA  
650 complexes were prepared by combining predesigned Alt-R CRISPR-Cas9 crRNA (*NLRP1*: 5'-  
651 ATACTGAGCCACCAGGTACG -3') with Alt-R CRISPR-Cas9 tracrRNA to 44  $\mu\text{M}$  and annealing  
652 by heating to 95 °C for 5 min followed by gradual cooling to ambient temperature over 30 min. To  
653 form the RNP complexes sgRNA samples and recombinant SAIt-R Cas9 enzyme were combined  
654 and incubated for 20 min.

655

656 **Stable Cell Line Generation.** Cells stably expressing indicated protein constructs were  
657 generated by infection with lentivirus containing the desired plasmids. Briefly, the lentivirus was  
658 produced by transfecting 70% confluent HEK 293T cells with the desired plasmid along with  
659 psPAX2 and pMD2.G following the manufacturer's instructions (FuGENE HD, Promega). The  
660 virus-containing medium was collected 48 h after transfection, passed through a 0.45  $\mu\text{m}$  filter,  
661 and concentrated by PEG precipitation (Abcam). THP-1, RAW 264.7, or MV4;11 cells were  
662 infected with the prepared lentivirus by centrifuging at 1000 x g for 1 h. After 48 h of incubation,  
663 cells were selected with an appropriate antibiotic.

664

665 **Transient transfections.** HEK 293T cells were plated in 6-well culture plates at  $5.0 \times 10^5$   
666 cells/well in DMEM. The next day, the indicated plasmids were mixed with an empty vector to a  
667 total of 2.0  $\mu\text{g}$  DNA in 125  $\mu\text{L}$  Opti-MEM and transfected using FuGENE HD (Promega) according  
668 to the manufacturer's protocol. Unless indicated otherwise, 0.05  $\mu\text{g}$  *CASP1*, 0.025  $\mu\text{g}$  *CARD8*



669 and 0.025  $\mu\text{g}$  *GSDMD-I104N* plasmids were used. After 16-20 h, the cells were treated as  
670 described. For microscopy experiments, HEK 293T cells were seeded into Lab-Tek II 8-well  
671 chambered coverglass plates at  $2 \times 10^4$  cells per chamber. After 48 h, the cells were transfected  
672 with 0.02  $\mu\text{g}$  of plasmids encoding C-terminally FLAG-tagged *NLRP1*, 0.01  $\mu\text{g}$  of a plasmid  
673 encoding N-terminally V5-GFP-tagged *ASC*, and 0.37  $\mu\text{g}$  of a plasmid encoding *RFP* using  
674 FuGene as the transfection agent and given 24 h to express protein and then treated with the  
675 indicated agent for 24 h, Hoechst stain (1  $\mu\text{g}/\text{mL}$ ) was added.

676

677 **Fluorescence microscopy and analysis.** Cells transfected as described above were imaged on  
678 a Zeiss Axio Observer.Z1 inverted widefield microscope using  $\times 10/0.95\text{NA}$  air objective. For each  
679 well, 10 positions were imaged in the brightfield, Hoechst (DAPI), RFP, and GFP channels. Data  
680 was analyzed using custom macro written in ImageJ/FIJI. The number of cells containing GFP-  
681 *ASC* specks was quantified by setting threshold values on the GFP channel, and performing the  
682 'Analyze Particles' algorithm, size =  $0-\infty$  and circularity = 0.50–1.00. The data was then exported  
683 to spreadsheet software, analyzed to compute the ratio of specks.

684

685 **Substrate assays.** For the peptide assay, a solution of substrate (PASKYLF) was synthesized  
686 by standard solid state peptide synthesis methods using chlorotrityl resin, and prepared in water.  
687 Lysates (normalized to 0.5  $\text{mg}/\text{mL}$  by DC Assay kit (Bio-Rad) were added to a 384-well, black,  
688 clear-bottom plate (Corning) with peptide PASKYLF (final conc. 1  $\text{mM}$ ), with a final volume per  
689 well of 25  $\mu\text{L}$ . Alanine liberated was measured as increasing fluorescence signal (Resorufin,  
690 Ex/Em: 535/587 nm) recorded at 25  $^{\circ}\text{C}$  using an L-alanine assay kit (Abcam, ab83394) at 25  $^{\circ}\text{C}$   
691 according to manufacturer's instructions. For the AMC reporter assays, experiments were  
692 performed in cells. For in cell assays,  $1.0 \times 10^5$  *CARD8*<sup>-/-</sup> THP-1 or HEK 293T WT cells were  
693 seeded per well in a 96-well, black, clear-bottom plate (Corning) in Opti-MEM reduced serum  
694 media and treated with compounds for 6 h before substrate (Ala-AMC, 100  $\mu\text{M}$ ; Leu-AMC, 100



695  $\mu\text{M}$ ; Ala-Pro-AMC, 250  $\mu\text{M}$ ) was added to the media to initiate the reaction. Substrate cleavage  
696 was measured as increasing fluorescence signal (Ex/Em: 380/460 nm) recorded at 25 °C for 25-  
697 40 mins. Cleavage rates are reported as the slope of the linear regression of AMC fluorescence  
698 vs. time data curve.

699  
700 **CETSA analysis.** HEK 293T cells were homogenized by sonication and cleared of debris by  
701 centrifugation at 10,000 x g for 10 min. Clarified lysates were then incubated with indicated  
702 inhibitors for 30 min, before heating at indicated temperatures for 30 min. Aggregated proteins  
703 were then precipitated by centrifugation at 18,000 x g for 20 min. Supernatant was then harvested  
704 and then subjected to immunoblotting.

705  
706 **Metabolite analysis using LC-MS.** HEK 293T ( $0.5 \times 10^6$ ) or THP-1 ( $0.75 \times 10^6$ ) cells were  
707 seeded on 6-well tissue culture dishes in 2 mL of DMEM or RPMI, respectively, supplemented  
708 with 10% FBS per well. The next day, cells were treated with the indicated compounds for up  
709 to 6 h. Metabolism was quenched and metabolites were extracted by aspirating medium and  
710 adding 1 mL of ice-cold 80:20 methanol:water containing  $^{13}\text{C}$  amino acid standards-. After  
711 overnight incubation at -80 °C, cells were collected and centrifuged at 20,000 x g for 20 min at  
712 4 °C. The supernatants were dried in a vacuum evaporator (Genevac EZ-2 Elite) for 3 hours.  
713 Dried extracts were resuspended in 40  $\mu\text{L}$  of 60% acetonitrile in water. Samples were vortexed,  
714 incubated on ice for 20 min, followed by addition of 10  $\mu\text{L}$  of methanol. After briefly vortexing,  
715 the dried extracts were clarified by centrifugation at 20,000 x g for 20 min at 4°C.

716 Dipeptide analysis was achieved using an Agilent 6545 Q-TOF mass spectrometer with  
717 Dual Jet Stream source in positive ionization, coupled to an Acquity UPLC BEH Amide column  
718 (150 mm x 2.1 mm, 1.7  $\mu\text{m}$  particle size, Waters) kept at 40 °C. Composition of Mobile Phase A  
719 consisted of 10 mM ammonium acetate in 10:90 acetonitrile: water with 0.2% acetic acid at pH 4.  
720 Mobile Phase B consisted of 10 mM ammonium acetate in 90:10 acetonitrile: water with 0.2%

721 acetic acid at pH 4. The gradient was as follows at an initial flow rate of 0.4 mL/min at 95% B; 9  
722 min, 70% B; 13 min, 30% B; 14 min, 30% B; 14.5 min, 95% B. The flow rate was increased to 0.6  
723 mL/min from 15 min, 95% B to 20 min, 95% B. The injection volume was 5  $\mu$ L for each sample.  
724 MS parameters included: gas temp: 300 °C; gas flow: 10 L/min; nebulizer pressure: 35 psig;  
725 sheath gas temp: 350 °C, sheath gas flow: 12 L/min; VCap: 4000 V; fragmentor: 125 V. Data was  
726 acquired from 50 – 1700 m/z with reference mass correction (m/z: 121.05087 and  
727 922.00980). Identification of dipeptides was achieved by running synthesized dipeptide standards  
728 to confirm retention time matching as well as performing tandem mass spectrometry (MS/MS) for  
729 spectral matching to SIRIUS (Duhrkop et al., 2019). Data analysis was performed using Agilent  
730 MassHunter Profinder 10.0 (Agilent Technologies).

731 Measurement of amino acid levels in *PEPD*<sup>-/-</sup>, *DPP8/9*<sup>-/-</sup> and WT HEK 293T cells was  
732 achieved by plating  $6.5 \times 10^5$  cells and seeding overnight, followed by treatment with VbP or MeBs  
733 for 3 h, then washing and harvesting of cells by pipetting in phosphate buffered saline, of which a  
734 small aliquot was collected for cellular protein normalization. Metabolite analysis was performed  
735 by Metabolon.

736  
737 **Stable Isotope Tracing.** HEK 293T ( $0.5 \times 10^6$ ) were grown for 23 days in labeled media  
738 consisting of DMEM deficient in L-leucine and L-glutamine, then supplemented with 10%  
739 dialyzed fetal bovine serum (FBS) and <sup>13</sup>C<sub>6</sub>-leucine (<sup>13</sup>C-Leu) and <sup>13</sup>C<sub>5</sub>-glutamine (<sup>13</sup>C-Gln).  $0.5$   
740  $\times 10^6$  cells were plated in labeled media, then the following day labeled media was replaced  
741 with unlabeled media (DMEM supplemented with 10% FBS) and simultaneously treated with  
742 VbP (10  $\mu$ M), MeBs (10  $\mu$ M) or Bortezomib (10  $\mu$ M) for 6 h. Metabolism was quenched and  
743 metabolites were extracted by aspirating medium and adding 1 mL of ice-cold 80:20  
744 methanol:water. After overnight incubation at -80 °C cells were collected and centrifuged at  
745 20,000 x g for 20 min at 4 °C. The supernatants were dried in a vacuum evaporator (Genevac  
746 EZ-2 Elite) for 3 hours. Dried extracts were resuspended in 40  $\mu$ L of 60% acetonitrile in water.

747 Samples were vortexed, incubated on ice for 20 min, followed by addition of 10  $\mu$ L methanol.  
748 After briefly vortexing, the dried extracts were clarified by centrifugation at 20,000 x g for 20  
749 min at 4  $^{\circ}$ C.

750 Amino acid isotope tracing analysis was achieved using an Agilent 6545 Q-TOF mass  
751 spectrometer with Dual Jet Stream source in positive ionization using the same liquid  
752 chromatography gradient and mass spectrometry conditions previously mentioned. Data  
753 analysis was performed using Agilent MassHunter Profinder 10.0 for isotope tracing data where  
754 natural isotope abundance correction was performed (Agilent Technologies

755

756 **Diazirine crosslinking and click chemistry.** HEK 293T cells were harvested and pelleted at  
757 400 x g, washed 3 x with cold PBS, resuspended in 1 mL of PBS and lysed by sonication. Lysates  
758 were then clarified at 20,000 x g for 15 min. The soluble fraction was retained, and protein  
759 concentrations were determined using the DC Protein Assay kit (Bio-Rad) and adjusted to 1  
760 mg/mL. Aliquots of 1.0 mL were treated with CQ83 probe (10  $\mu$ M) for 30 min. For competition  
761 experiments the lysates pretreated with 100  $\mu$ M inhibitor MeBs (30 min) and then probe (30 min).  
762 Samples were then irradiated for 30 min in the Photochemical Reactor equipped with 350 nm  
763 lamps at 4  $^{\circ}$ C. 10  $\mu$ L 4% SDS was added to each sample and heated at 60  $^{\circ}$ C for 30 min. Added  
764 the mix of click reagent gents (1 mM CuSO<sub>4</sub>, 100  $\mu$ M BTAA ligand and 100  $\mu$ M biotin-PEG3  
765 azide, 1 mM TCEP) and incubate for 60 min at RT. Protein samples were then precipitated with  
766 acetone and frozen at -20  $^{\circ}$ C overnight. Samples were then centrifuged 3,500 x g for 5 min at 4  
767  $^{\circ}$ C, aqueous/acetone solution was removed and protein precipitates and washed 3x with (cold  
768 acetone 1 mL, sonication and re-precipitated at -20  $^{\circ}$ C for 15 min, then spun at 3500 x g for 5  
769 min at 4  $^{\circ}$ C). After the final wash, the pellets were air dried at RT for 10 min and re-solubilized in  
770 100  $\mu$ L 4% SDS PBS by sonication and gentle heat, then added PBS (2 mL) and diluted to 0.2%  
771 SDS. They were then enriched with streptavidin beads (100  $\mu$ L per sample), incubated at room  
772 temperature for 1 h. Beads were then pelleted by centrifugation (1400 x g, 2 min), washed with

773 1% SDS PBS x 3, 2 M Urea PBS x 3, PBS X 3 each 2 mL). These samples were then split for  
774 immunoblot and proteomic analysis.

775

776 **Tandem mass tag labeling for mass spectrometry.** To the solution of the probe-bound  
777 streptavidin beads from above, ammonium bicarbonate (ABC) (25 mM) and 10 mM DTT 20  $\mu$ L  
778 (100 mM stock) was added, then placed in 42 °C heat block for 30 min. 200  $\mu$ L of 20 mM  
779 iodoacetamide was added and allowed to react at 37 °C for 30 min (protected from light). It was  
780 then spun down and washed with 10 mM DTT in 200  $\mu$ L ABC, followed by washed 3 x with 25  
781 mM ABC. The beads were pelleted by centrifugation (1,300 x g, 2 min) and resuspended in 200  
782  $\mu$ L of 25 mM ABC, 1mM CaCl<sub>2</sub> 2  $\mu$ L, and trypsin 2  $\mu$ g. The digestion was allowed to proceed  
783 overnight at 37 °C with shaking. Digested peptides were collected and dried using Genevac EZ-  
784 2 evaporator. TMTsixplex<sup>TM</sup> Isobaric Label Reagents (ThermoFisher Scientific), 0.8 mg per label,  
785 were equilibrated to room temperature, dissolved in 60  $\mu$ L of dry acetonitrile and mixed by  
786 vortexing briefly before use. 7.5  $\mu$ L of each TMT label reagent was carefully added to each sample  
787 (126 and 127 for the blank control, 128 and 129 for the probe, 130 and 131 for the competition)  
788 and incubated at room temperature for 1 h. 3  $\mu$ L of 5% hydroxylamine was then added to each  
789 sample and incubated for 15 mins to quench the labeling reaction. Samples were then combined  
790 in equal quantities (about 100  $\mu$ g), purified using the High pH Reversed-Phase Peptide  
791 Fractionation Kit (Pierce), and divided into two fractions (CQ83TMT1 and CQ83TMT2), and dried  
792 with a Genevac EZ-2 evaporator.

793

794 **Tandem LC-MS/MS/MS** Mass spectrometry data was collected on an Orbitrap Fusion Lumos  
795 mass spectrometer coupled to an Easy-nLC 1200 (Thermo Fisher Scientific). Peptides were  
796 separated over a 180 min gradient of 0 to 50% acetonitrile in water with 0.1% formic acid at a  
797 flow rate of 300 nL/min on a 50 cm long PepMap RSLC C18 column (2 mm, 100 Å, 75  $\mu$ m, x 50  
798 cm). The full MS spectra were acquired in the Orbitrap at a resolution of 120,000. The 10 most

799 intense MS1 ions were selected for MS2 analysis. The isolation width was set at 0.7 m/z and  
800 isolated precursors were fragmented by CID (35% CE). Following acquisition of each MS2  
801 spectrum, a synchronous precursor selection (SPS) MS3 scan was collected on the top 10 most  
802 intense ions in the MS2 spectrum. The isolation width was set at 1.2 m/z and isolated  
803 precursors were fragmented using HCD. The mass spectrometry proteomics data will be made  
804 available at the ProteomeXchange Consortium (<http://proteomecentral.proteomexchange.org>)  
805 via the PRIDE partner repository (Perez-Riverol et al., 2019).

806 **Proteomic analysis** MS raw files were analyzed using MaxQuant v1.6.17.0 by searching against  
807 the Uniprot human database supplemented with common contaminant protein sequences and  
808 quantifying according to SPS MS3 reporter ions. MaxQuant was run using the following  
809 parameters: reporter Ion MS3 – 6plex TMT; variable modifications - methionine oxidation  
810 (+15.995 Da), N-terminal protein acetylation (+42.011 Da), asparagine or glutamine deamidation  
811 (+0.984 Da); fixed modification - carbamido- methylation (+57.021 Da) of cysteine; digestion –  
812 trypsin/P.

813 **IL-1 $\beta$  ELISA assays.**  $2 \times 10^5$  N/TERT-1 cells were plate on 6-well tissue culture plates and  
814 adhered overnight. Cells were then treated with compounds for the indicated time points and  
815 spent media samples were collected and clarified by centrifugation at 1000 x g for 1 min.  
816 Supernatants were harvested for quantitation using the R&D Human IL-1 $\beta$  quantikine ELISA kit  
817 according to the manufacturer's instructions.

818  
819 **RNA-seq.**  $2.5 \times 10^6$  *CASP1*<sup>-/-</sup> MV4;11 cells were plated in 6-well plates and treated with DMSO,  
820 MeBs (10  $\mu$ M) or BFA (1.78  $\mu$ M) in quadruplets for 6 h. Cellular RNA was extracted using the  
821 RNeasy Mini Kit (Qiagen) and residual genomic DNA was removed by on-membrane DNase  
822 digestion (Qiagen). The total RNA samples were sent to GENEWIZ for PolyA selection, library

823 preparation, barcoding and sequencing using HiSeq configured for 2×150 bp paired-end reads  
824 (Illumina). An average of  $28.9 \times 10^6$  paired reads was generated per sample with a mean quality  
825 score of 35.81. The sequence reads were mapped to the *Homo sapiens* GRCh38 reference  
826 genome using STAR aligner v.2.5.2b, and unique gene hits were calculated using the Subread  
827 package v.1.5.2. The gene hits tables were then used for differential expression analysis by  
828 DESeq2. The Wald test was used to generate p-values and log2 fold changes.

829

830 **Reverse Transcription – Quantitative Real-Time PCR (RT-qPCR).** Total RNA was isolated  
831 from HEK 293T or *CASP1*<sup>-/-</sup> MV4;11 cells at the end of the experiment using the RNeasy Mini Kit  
832 (Qiagen) and reverse transcription-PCR was performed on 0.8 µg of mRNA using High Capacity  
833 cDNA Reverse Transcription Kit (Applied Biosystems). qPCR was performed on the cDNA for  
834 *CHAC1*, *DDIT3*, *DDIT4*, *SESN2*, *TRIB3*, and the housekeeping gene *GAPDH* using the indicated  
835 primer pairs and the PowerUp SYBR Green Master Mix dye (Applied Biosystems) on a  
836 QuantStudio 5 Real-Time PCR system (ThermoFisher). Data were analyzed using the  
837  $\Delta\Delta C_t$  method in which  $\Delta C_t$  is the difference between the  $C_t$  value of the Gene of Interest and  
838 *GAPDH*,  $\Delta\Delta C_t$  is the difference between the treatment condition and DMSO, and the fold change  
839 is  $2^{-\Delta\Delta C_t}$ .

840

841 **Puromycin cellular translation rate assay.** HEK 293T cells were treated with the indicated  
842 compounds for 6 h prior to lysis. Lysates were treated with 10 µg/mL puromycin for 10 min, then  
843 immunoblot analysis was performed using an antibody raised against puromycin.

844

845 **dTAG-CARD8 Assay.** HEK293T cells stably expressing *CASP1* and *GSDMD* were seeded at  
846  $1.25 \times 10^5$  cells per well in 12-well tissue culture dishes. After 48 h, the cells were transfected with  
847 plasmids encoding dTAG-CARD8-ZUC (0.5 µg), CARD8 FIIND-S297A (0.3 µg) and RFP (0.2 µg)  
848 with FuGENE HD, according to the manufacturer's instructions (Promega). At 24 h, cells were

849 treated with DMSO, dTAG-13 (500 nM) and/or VbP (10  $\mu$ M) for 3 h. Lysates were collected and  
850 protein content was evaluated by immunoblotting.

851  
852 **Statistical analysis.** Two-sided Student's t tests were used for significance testing unless stated  
853 otherwise. *P* values less than 0.05 were considered to be significant. Graphs and error bars  
854 represent means  $\pm$  SEM of three independent experiments, unless stated otherwise. The  
855 investigators were not blinded in all experiments. All statistical analysis was performed using  
856 Microsoft Excel and GraphPad Prism 9.

857  
858 **Experimental Procedures and Spectroscopic Data of Compounds**

859 **General Procedures.** All reactions were carried out under an argon atmosphere with dry solvents  
860 under anhydrous conditions, unless otherwise noted. Reagents were purchased from Aldrich,  
861 Acros, or Fisher at the highest commercial quality and used without further purification, unless  
862 otherwise stated. Reactions were monitored by thin layer chromatography (TLC) carried out on  
863 MilliporeSigma glass TLC plates (silica gel 60 coated with F<sub>254</sub>, 250  $\mu$ m) using UV light for  
864 visualization and aqueous ammonium cerium nitrate/ammonium molybdate or basic aqueous  
865 potassium permanganate as developing agent. NMR spectra were recorded on a Bruker Avance  
866 III 600 MHz. The spectra were calibrated by using residual undeuterated solvents (for <sup>1</sup>H NMR)  
867 and deuterated solvents (for <sup>13</sup>C NMR) as internal references: undeuterated chloroform ( $\delta_{\text{H}} = 7.26$   
868 ppm) and CDCl<sub>3</sub> ( $\delta_{\text{C}} = 77.16$  ppm); undeuterated methanol ( $\delta_{\text{H}} = 3.31$  ppm) and methanol-d<sub>4</sub> ( $\delta_{\text{C}}$   
869 = 49.00 ppm). The following abbreviations are used to designate multiplicities: s = singlet, d =  
870 doublet, t = triplet, q = quartet, m = multiplet, br = broad. High-resolution mass spectra (HRMS)  
871 were recorded on a Waters Micromass LCT Premier XE TOF LC-MS.

872 Scheme S1. Synthesis of CQ83 (**6**)



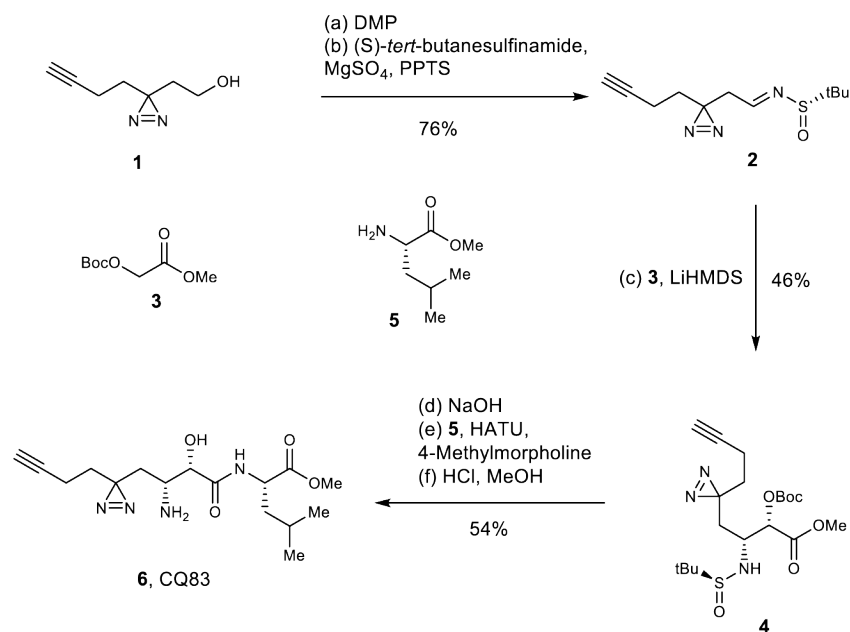

873  
874 **(S)-N-(2-(3-(but-3-yn-1-yl)-3H-diazirin-3-yl)ethylidene)-*tert*-butylsulfonamide (3):** To a  
875 solution of 2-(3-but-3-yn-1-yl-3H-diazirin-3-yl)-ethanol (50.0 mg, 0.362 mmol) in dry CH<sub>2</sub>Cl<sub>2</sub> (1.2  
876 mL) was added DMP (230 mg, 0.542 mmol) at 22 °C. The reaction mixture was stirred for 10 min  
877 at the same temperature before being passed through a short plug of silica gel with EtOAc/hexane  
878 (1:4) to give a colorless oil which was used for the next step without further purifications. To a  
879 solution of the crude aldehyde in dry CH<sub>2</sub>Cl<sub>2</sub> (5 mL) were added pyridinium *p*-toluenesulfonate  
880 (PPTS, 4.8 mg, 0.0191 mmol), anhydrous MgSO<sub>4</sub> (218 mg, 1.81 mmol) and (S)-*tert*-  
881 butanesulfinamide (66.0 mg, 0.545 mmol). The reaction mixture was stirred for 14 h at 22 °C.  
882 Then filtered through a pad of celite, washed with CH<sub>2</sub>Cl<sub>2</sub> and concentrated under vacuum. The  
883 residue was passed through a short plug of silica gel with EtOAc/hexane (1:4) to give the desired  
884 imine **2** (66.1 mg, 76%) as a colorless oil. **2**: <sup>1</sup>H NMR (600 MHz, CDCl<sub>3</sub>): δ = δ 8.01 (t, *J* = 4.4 Hz,  
885 1 H), 2.58 (dd, *J* = 17.0, 4.4 Hz, 1 H), 2.52 (dd, *J* = 17.1, 4.3 Hz, 1 H), 2.06 (ddd, *J* = 7.2, 2.8, 0.8  
886 Hz, 1 H), 2.04 (dd, *J* = 7.2, 2.7 Hz, 1 H), 2.01 (t, *J* = 2.7 Hz, 1 H), 1.82 – 1.71 (m, 2 H), 1.24 (s, 9  
887 H) ppm; <sup>13</sup>C NMR (151 MHz, CDCl<sub>3</sub>): δ = 163.5, 82.5, 69.8, 57.2, 40.8, 32.3, 26.1, 22.6, 13.4 ppm;  
888 HRMS (*m/z*): [M+H]<sup>+</sup> calcd for C<sub>11</sub>H<sub>18</sub>N<sub>3</sub>OS<sup>+</sup> 240.1171, found 240.1171.

889 **Methyl (2S,3R)-4-(3-(but-3-yn-1-yl)-3H-diazirin-3-yl)-2-((tert-butoxycarbonyl)oxy)-3-(((S)-**  
890 **tert-butylsulfinyl)amino)butanoate (4):** A solution of methyl 2-((tert-butoxycarbonyl)oxy)acetate  
891 **3** (213 mg, 1.12 mmol) in dry THF (3 mL) maintained under an atmosphere of argon was cooled  
892 to  $-78\text{ }^{\circ}\text{C}$  and then treated with LiHMDS (1.12 mL, 1.0 M solution in THF, 1.12 mmol). The reaction  
893 mixture was stirred for 1 h at the same temperature before imine **2** (53 mg, 0.221 mmol) in THF  
894 (200  $\mu\text{L}$ ) was added slowly. The mixture was allowed to stir for 5 h before it was quenched with  
895 saturated aq.  $\text{NH}_4\text{Cl}$  (5 mL). The aqueous phase was extracted with EtOAc ( $3 \times 10\text{ mL}$ ). The  
896 combined organic phases were washed with brine (10 mL), dried over anhydrous  $\text{MgSO}_4$ , filtered  
897 and concentrated under vacuum. The residue was passed through a short plug of silica gel with  
898 EtOAc/hexane (1:3) to give the desired methyl ester **4** (43.7 mg, 46%) as a colorless oil. **4**:  $^1\text{H}$   
899 NMR (600 MHz,  $\text{CDCl}_3$ ):  $\delta = 4.91$  (br s, 1 H), 4.45 (dd,  $J = 11.8, 5.8\text{ Hz}$ , 1 H), 3.79 (s, 3 H), 3.55  
900 (ddd,  $J = 10.8, 5.9, 3.6\text{ Hz}$ , 1 H), 2.85 (br s, 1 H), 2.07 – 1.88 (m, 4 H), 1.67 – 1.52 (m, 2 H), 1.50  
901 (s, 9 H), 1.14 (s, 9 H) ppm;  $^{13}\text{C}$  NMR (151 MHz,  $\text{CDCl}_3$ ):  $\delta = \delta 172.9, 155.6, 84.6, 82.6, 77.4, 72.4,$   
902 69.5, 60.4, 52.4, 46.2, 32.4, 28.3, 26.1, 22.9, 13.4 ppm; HRMS ( $m/z$ ):  $[\text{M}+\text{H}]^+$  calcd for  
903  $\text{C}_{19}\text{H}_{32}\text{N}_3\text{O}_6\text{S}^+$  430.2012, found 430.2002.

904 **Methyl((2S,3R)-3-amino-4-(3-(but-3-yn-1-yl)-3H-diazirin-3-yl)-2-hydroxybutanoyl)-L-**  
905 **leucinate (6):** To the solution of methyl ester **3** (36 mg, 0.0838 mmol) in 1,4-dioxane/ $\text{H}_2\text{O}$  (1:1,  
906 1.0 mL was added NaOH (3.0 mg, 0.125 mmol) and the reaction mixture was stirred at  $22\text{ }^{\circ}\text{C}$  for  
907 1 h. The mixture was acidified to pH 3-4 with Dowex® 50W X8 resin. The resin was filtered and  
908 washed with  $\text{CH}_2\text{Cl}_2$ . The aqueous phase was extracted with  $\text{CH}_2\text{Cl}_2$  ( $3 \times 10\text{ mL}$ ). The combined  
909 organic phases were washed with brine (10 mL), dried over anhydrous  $\text{MgSO}_4$ , filtered and  
910 concentrated under vacuum to give a colorless oil which was used for the next step without further  
911 purifications. To a solution of crude oil from the last step in  $\text{CH}_2\text{Cl}_2$  (2.0 mL) were sequentially  
912 added L-Leucine methyl ester hydrochloride **5** (18.2 mg, 0.100 mmol), HATU (38.1 mg, 0.100  
913 mmol), 4-Methylmorpholine (21.2 mg, 23  $\mu\text{L}$ , 0.209 mmol, at  $0\text{ }^{\circ}\text{C}$ ). The reaction mixture was  
914 allowed to stir for another 3 h before it was quenched by addition of saturated aq.  $\text{NaHCO}_3$  solution

915 (2 mL). The organic layer was separated, and the aqueous layer was extracted with CH<sub>2</sub>Cl<sub>2</sub> (3 ×  
916 5 mL). The organic layers were combined, washed with brine (10 mL), dried over Na<sub>2</sub>SO<sub>4</sub>, and  
917 concentrated under vacuum. The resulting residue was purified by flash column chromatography  
918 (silica gel, EtOAc:hexane = 1:4, v/v → 1:1, v/v) to give the desired amide as a colorless oil. To a  
919 stirred solution of the obtained oil in MeOH (0.3 mL) was added HCl (0.3 mL, 3.0 M solution in  
920 MeOH, 0.9 mmol) at 0 °C. The reaction mixture was warmed 22 °C and stirred for 24 h at the  
921 same temperature. The mixture was concentrated under vacuum, and the residue was purified  
922 by recrystallization from MeOH/diethyl ether to give **6** (17.0 mg, 54% for 3 steps) as a white solid.  
923 **6**: <sup>1</sup>H NMR (600 MHz, methanol-d<sub>4</sub>): δ = 4.47 (dd, *J* = 9.6, 4.5 Hz, 1 H), 4.33 (d, *J* = 3.5 Hz, 1 H),  
924 3.74 (s, 3 H), 3.51 (dd, *J* = 6.9, 3.4 Hz, 1 H), 2.34 (d, *J* = 2.7 Hz, 1 H), 2.08 – 2.03 (m, 2 H), 1.96  
925 (dd, *J* = 15.3, 7.1 Hz, 1 H), 1.77 (dq, *J* = 15.6, 8.3, 7.8 Hz, 1 H), 1.73 – 1.65 (m, 5 H), 0.98 (d, *J* =  
926 5.6 Hz, 3 H), 0.95 (d, *J* = 5.6 Hz, 3 H) ppm; <sup>13</sup>C NMR (151 MHz, methanol-d<sub>4</sub>): δ = 174.4, 173.1,  
927 83.3, 70.8, 70.5, 52.9, 52.4, 50.9, 41.1, 34.3, 32.7, 26.5, 26.0, 23.2, 22.0, 13.7. ppm; HRMS (*m/z*):  
928 [M+H]<sup>+</sup> calcd for C<sub>16</sub>H<sub>27</sub>N<sub>4</sub>O<sub>4</sub><sup>+</sup> 339.2032, found 339.2022.

929

930

931

932

933

934

935

936

## 937 **References**

938 Bachovchin, D.A. (2021). NLRP1: a jack of all trades, or a master of one? *Mol Cell* *81*, 423-425.

939 Ball, D.P., Taabazuing, C.Y., Griswold, A.R., Orth, E.L., Rao, S.D., Kotliar, I.B., Vostal, L.E.,  
940 Johnson, D.C., and Bachovchin, D.A. (2020). Caspase-1 interdomain linker cleavage is required  
941 for pyroptosis. *Life Sci Alliance* *3*.

942 Ball, D.P., Wang, A.E., Warren, C.D., Wang, Q., Griswold, A.R., Rao, S.D., and Bachovchin, D.A.  
943 (2021). Oxidized thioredoxin-1 restrains the NLRP1 inflammasome. *bioRxiv*,  
944 2021.2009.2020.461118.

- 945 Baugh, J.M., Viktorova, E.G., and Pilipenko, E.V. (2009). Proteasomes can degrade a significant  
946 proportion of cellular proteins independent of ubiquitination. *J Mol Biol* 386, 814-827.
- 947 Boyden, E.D., and Dietrich, W.F. (2006). Nalp1b controls mouse macrophage susceptibility to  
948 anthrax lethal toxin. *Nat Genet* 38, 240-244.
- 949 Broz, P., and Dixit, V.M. (2016). Inflammasomes: mechanism of assembly, regulation and  
950 signalling. *Nat Rev Immunol* 16, 407-420.
- 951 Burley, S.K., David, P.R., and Lipscomb, W.N. (1991). Leucine aminopeptidase: bestatin inhibition  
952 and a model for enzyme-catalyzed peptide hydrolysis. *Proc Natl Acad Sci U S A* 88, 6916-6920.
- 953 Chui, A.J., Griswold, A.R., Taabazuing, C.Y., Orth, E.L., Gai, K., Rao, S.D., Ball, D.P., Hsiao, J.C.,  
954 and Bachovchin, D.A. (2020). Activation of the CARD8 Inflammasome Requires a Disordered  
955 Region. *Cell Rep* 33, 108264.
- 956 Chui, A.J., Okondo, M.C., Rao, S.D., Gai, K., Griswold, A.R., Johnson, D.C., Ball, D.P.,  
957 Taabazuing, C.Y., Orth, E.L., Vitimberga, B.A., *et al.* (2019). N-terminal degradation activates the  
958 NLRP1B inflammasome. *Science* 364, 82-85.
- 959 Cirelli, K.M., Gofu, G., Hassan, M.A., Printz, M., Crown, D., Leppla, S.H., Grigg, M.E., Saeij, J.P.,  
960 and Moayeri, M. (2014). Inflammasome sensor NLRP1 controls rat macrophage susceptibility to  
961 *Toxoplasma gondii*. *PLoS Pathog* 10, e1003927.
- 962 Citterio, C., Vichi, A., Pacheco-Rodriguez, G., Aponte, A.M., Moss, J., and Vaughan, M. (2008).  
963 Unfolded protein response and cell death after depletion of brefeldin A-inhibited guanine  
964 nucleotide-exchange protein GBF1. *Proc Natl Acad Sci U S A* 105, 2877-2882.
- 965 D'Oswaldo, A., Weichenberger, C.X., Wagner, R.N., Godzik, A., Wooley, J., and Reed, J.C.  
966 (2011). CARD8 and NLRP1 undergo autoproteolytic processing through a ZU5-like domain. *PLoS*  
967 *One* 6, e27396.
- 968 Doench, J.G., Fusi, N., Sullender, M., Hegde, M., Vaimberg, E.W., Donovan, K.F., Smith, I.,  
969 Tothova, Z., Wilen, C., Orchard, R., *et al.* (2016). Optimized sgRNA design to maximize activity  
970 and minimize off-target effects of CRISPR-Cas9. *Nat Biotechnol* 34, 184-191.
- 971 Duhrkop, K., Fleischauer, M., Ludwig, M., Aksenov, A.A., Melnik, A.V., Meusel, M., Dorrestein,  
972 P.C., Rousu, J., and Bocker, S. (2019). SIRIUS 4: a rapid tool for turning tandem mass spectra  
973 into metabolite structure information. *Nat Methods* 16, 299-302.
- 974 Ewald, S.E., Chavarria-Smith, J., and Boothroyd, J.C. (2014). NLRP1 is an inflammasome sensor  
975 for *Toxoplasma gondii*. *Infect Immun* 82, 460-468.
- 976 Finger, J.N., Lich, J.D., Dare, L.C., Cook, M.N., Brown, K.K., Duraiswami, C., Bertin, J., and  
977 Gough, P.J. (2012). Autolytic proteolysis within the function to find domain (FIIND) is required for  
978 NLRP1 inflammasome activity. *J Biol Chem* 287, 25030-25037.
- 979 Flygare, J.A., Beresini, M., Budha, N., Chan, H., Chan, I.T., Cheeti, S., Cohen, F., Deshayes, K.,  
980 Doerner, K., Eckhardt, S.G., *et al.* (2012). Discovery of a potent small-molecule antagonist of  
981 inhibitor of apoptosis (IAP) proteins and clinical candidate for the treatment of cancer (GDC-0152).  
982 *J Med Chem* 55, 4101-4113.

- 983 Frew, B.C., Joag, V.R., and Mogridge, J. (2012). Proteolytic processing of Nlrp1b is required for  
984 inflammasome activity. *PLoS Pathog* 8, e1002659.
- 985 Fujiwara, T., Oda, K., Yokota, S., Takatsuki, A., and Ikehara, Y. (1988). Brefeldin A causes  
986 disassembly of the Golgi complex and accumulation of secretory proteins in the endoplasmic  
987 reticulum. *J Biol Chem* 263, 18545-18552.
- 988 Gai, K., Okondo, M.C., Rao, S.D., Chui, A.J., Ball, D.P., Johnson, D.C., and Bachovchin, D.A.  
989 (2019). DPP8/9 inhibitors are universal activators of functional NLRP1 alleles. *Cell Death Dis* 10,  
990 587.
- 991 Geiss-Friedlander, R., Parmentier, N., Moller, U., Urlaub, H., Van den Eynde, B.J., and Melchior,  
992 F. (2009). The cytoplasmic peptidase DPP9 is rate-limiting for degradation of proline-containing  
993 peptides. *J Biol Chem* 284, 27211-27219.
- 994 Griswold, A.R., Ball, D.P., Bhattacharjee, A., Chui, A.J., Rao, S.D., Taabazuing, C.Y., and  
995 Bachovchin, D.A. (2019a). DPP9's Enzymatic Activity and Not Its Binding to CARD8 Inhibits  
996 Inflammasome Activation. *ACS Chem Biol* 14, 2424-2429.
- 997 Griswold, A.R., Cifani, P., Rao, S.D., Axelrod, A.J., Miele, M.M., Hendrickson, R.C., Kentsis, A.,  
998 and Bachovchin, D.A. (2019b). A Chemical Strategy for Protease Substrate Profiling. *Cell Chem*  
999 *Biol* 26, 901-907 e906.
- 1000 Gyrd-Hansen, M., and Meier, P. (2010). IAPs: from caspase inhibitors to modulators of NF-  
1001 kappaB, inflammation and cancer. *Nat Rev Cancer* 10, 561-574.
- 1002 Helms, J.B., and Rothman, J.E. (1992). Inhibition by brefeldin A of a Golgi membrane enzyme  
1003 that catalyses exchange of guanine nucleotide bound to ARF. *Nature* 360, 352-354.
- 1004 Hollingsworth, L.R., Sharif, H., Griswold, A.R., Fontana, P., Mintseris, J., Dagbay, K.B., Paulo,  
1005 J.A., Gygi, S.P., Bachovchin, D.A., and Wu, H. (2021). DPP9 sequesters the C terminus of NLRP1  
1006 to repress inflammasome activation. *Nature* 592, 778-783.
- 1007 Hornung, V., Ablasser, A., Charrel-Dennis, M., Bauernfeind, F., Horvath, G., Caffrey, D.R., Latz,  
1008 E., and Fitzgerald, K.A. (2009). AIM2 recognizes cytosolic dsDNA and forms a caspase-1-  
1009 activating inflammasome with ASC. *Nature* 458, 514-518.
- 1010 Huang, M., Zhang, X., Toh, G.A., Gong, Q., Wang, J., Han, Z., Wu, B., Zhong, F., and Chai, J.  
1011 (2021). Structural and biochemical mechanisms of NLRP1 inhibition by DPP9. *Nature* 592, 773-  
1012 777.
- 1013 Johnson, D.C., Okondo, M.C., Orth, E.L., Rao, S.D., Huang, H.C., Ball, D.P., and Bachovchin,  
1014 D.A. (2020). DPP8/9 inhibitors activate the CARD8 inflammasome in resting lymphocytes. *Cell*  
1015 *Death Dis* 11, 628.
- 1016 Johnson, D.C., Taabazuing, C.Y., Okondo, M.C., Chui, A.J., Rao, S.D., Brown, F.C., Reed, C.,  
1017 Peguero, E., de Stanchina, E., Kentsis, A., *et al.* (2018). DPP8/DPP9 inhibitor-induced pyroptosis  
1018 for treatment of acute myeloid leukemia. *Nat Med* 24, 1151-1156.

- 1019 Kisselev, A.F., Akopian, T.N., Woo, K.M., and Goldberg, A.L. (1999). The sizes of peptides  
1020 generated from protein by mammalian 26 and 20 S proteasomes. Implications for understanding  
1021 the degradative mechanism and antigen presentation. *J Biol Chem* 274, 3363-3371.
- 1022 Kovaleva, I.E., Garaeva, A.A., Chumakov, P.M., and Evstafieva, A.G. (2016).  
1023 Intermedin/adrenomedullin 2 is a stress-inducible gene controlled by activating transcription factor  
1024 4. *Gene* 590, 177-185.
- 1025 Krige, D., Needham, L.A., Bawden, L.J., Flores, N., Farmer, H., Miles, L.E., Stone, E., Callaghan,  
1026 J., Chandler, S., Clark, V.L., *et al.* (2008). CHR-2797: an antiproliferative aminopeptidase inhibitor  
1027 that leads to amino acid deprivation in human leukemic cells. *Cancer Res* 68, 6669-6679.
- 1028 Labbe, K., McIntire, C.R., Doiron, K., Leblanc, P.M., and Saleh, M. (2011). Cellular inhibitors of  
1029 apoptosis proteins cIAP1 and cIAP2 are required for efficient caspase-1 activation by the  
1030 inflammasome. *Immunity* 35, 897-907.
- 1031 Li, J., Qian, X., and Sha, B. (2003). The crystal structure of the yeast Hsp40 Ydj1 complexed with  
1032 its peptide substrate. *Structure* 11, 1475-1483.
- 1033 Linder, A., Bauernfried, S., Cheng, Y., Albanese, M., Jung, C., Keppler, O.T., and Hornung, V.  
1034 (2020). CARD8 inflammasome activation triggers pyroptosis in human T cells. *EMBO J*, e105071.
- 1035 Liu, C.W., Corboy, M.J., DeMartino, G.N., and Thomas, P.J. (2003). Endoproteolytic activity of  
1036 the proteasome. *Science* 299, 408-411.
- 1037 Mungrue, I.N., Pagnon, J., Kohanim, O., Gargalovic, P.S., and Lusic, A.J. (2009).  
1038 CHAC1/MGC4504 is a novel proapoptotic component of the unfolded protein response,  
1039 downstream of the ATF4-ATF3-CHOP cascade. *J Immunol* 182, 466-476.
- 1040 Nabet, B., Roberts, J.M., Buckley, D.L., Paulk, J., Dastjerdi, S., Yang, A., Leggett, A.L., Erb, M.A.,  
1041 Lawlor, M.A., Souza, A., *et al.* (2018). The dTAG system for immediate and target-specific protein  
1042 degradation. *Nat Chem Biol* 14, 431-441.
- 1043 Neckers, L., Mimnaugh, E., and Schulte, T.W. (1999a). Hsp90 as an anti-cancer target. *Drug*  
1044 *Resist Updat* 2, 165-172.
- 1045 Neckers, L., Schulte, T.W., and Mimnaugh, E. (1999b). Geldanamycin as a potential anti-cancer  
1046 agent: its molecular target and biochemical activity. *Invest New Drugs* 17, 361-373.
- 1047 Newman, Z.L., Printz, M.P., Liu, S., Crown, D., Breen, L., Miller-Randolph, S., Flodman, P.,  
1048 Leppla, S.H., and Moayeri, M. (2010). Susceptibility to anthrax lethal toxin-induced rat death is  
1049 controlled by a single chromosome 10 locus that includes rNlrp1. *PLoS Pathog* 6, e1000906.
- 1050 Okondo, M.C., Johnson, D.C., Sridharan, R., Go, E.B., Chui, A.J., Wang, M.S., Poplawski, S.E.,  
1051 Wu, W., Liu, Y., Lai, J.H., *et al.* (2017). DPP8 and DPP9 inhibition induces pro-caspase-1-  
1052 dependent monocyte and macrophage pyroptosis. *Nat Chem Biol* 13, 46-53.
- 1053 Okondo, M.C., Rao, S.D., Taabazuing, C.Y., Chui, A.J., Poplawski, S.E., Johnson, D.C., and  
1054 Bachovchin, D.A. (2018). Inhibition of Dpp8/9 Activates the Nlrp1b Inflammasome. *Cell Chem*  
1055 *Biol* 25, 262-267 e265.



- 1056 Otvos, L., Jr., O, I., Rogers, M.E., Consolvo, P.J., Condie, B.A., Lovas, S., Bulet, P., and  
1057 Blaszczyk-Thurin, M. (2000). Interaction between heat shock proteins and antimicrobial peptides.  
1058 *Biochemistry* 39, 14150-14159.
- 1059 Pakos-Zebrucka, K., Koryga, I., Mnich, K., Ljujic, M., Samali, A., and Gorman, A.M. (2016). The  
1060 integrated stress response. *EMBO Rep* 17, 1374-1395.
- 1061 Perez-Riverol, Y., Csordas, A., Bai, J., Bernal-Llinares, M., Hewapathirana, S., Kundu, D.J.,  
1062 Inuganti, A., Griss, J., Mayer, G., Eisenacher, M., *et al.* (2019). The PRIDE database and related  
1063 tools and resources in 2019: improving support for quantification data. *Nucleic Acids Res* 47,  
1064 D442-D450.
- 1065 Rao, S.D., Chen, Q., Wang, Q., Orth-He, E.L., Saoi, M., Griswold, A.R., Bhattacharjee, A., Ball,  
1066 D.P., Huang, H.C., Chui, A.J., *et al.* (2022). M24B aminopeptidase inhibitors selectively activate  
1067 the CARD8 inflammasome. *Nat Chem Biol*.
- 1068 Robinson, K.S., Teo, D.E.T., Tan, K.S., Toh, G.A., Ong, H.H., Lim, C.K., Lay, K., Au, B.V., Lew,  
1069 T.S., Chu, J.J.H., *et al.* (2020). Enteroviral 3C protease activates the human NLRP1  
1070 inflammasome in airway epithelia. *Science* 370.
- 1071 Sandstrom, A., Mitchell, P.S., Goers, L., Mu, E.W., Lesser, C.F., and Vance, R.E. (2019).  
1072 Functional degradation: A mechanism of NLRP1 inflammasome activation by diverse pathogen  
1073 enzymes. *Science*.
- 1074 Saric, T., Graef, C.I., and Goldberg, A.L. (2004). Pathway for degradation of peptides generated  
1075 by proteasomes: a key role for thimet oligopeptidase and other metallopeptidases. *J Biol Chem*  
1076 279, 46723-46732.
- 1077 Sato, S., Aoyama, H., Miyachi, H., Naito, M., and Hashimoto, Y. (2008). Demonstration of direct  
1078 binding of cIAP1 degradation-promoting bestatin analogs to BIR3 domain: Synthesis and  
1079 application of fluorescent bestatin ester analogs. *Bioorg Med Chem Lett* 18, 3354-3358.
- 1080 Sekine, K., Takubo, K., Kikuchi, R., Nishimoto, M., Kitagawa, M., Abe, F., Nishikawa, K., Tsuruo,  
1081 T., and Naito, M. (2008). Small molecules destabilize cIAP1 by activating auto-ubiquitylation. *J*  
1082 *Biol Chem* 283, 8961-8968.
- 1083 Sharif, H., Hollingsworth, L.R., Griswold, A.R., Hsiao, J.C., Wang, Q., Bachovchin, D.A., and Wu,  
1084 H. (2021). Dipeptidyl peptidase 9 sets a threshold for CARD8 inflammasome formation by  
1085 sequestering its active C-terminal fragment. *Immunity*.
- 1086 Suda, H., Aoyagi, T., Takeuchi, T., and Umezawa, H. (1976). Inhibition of aminopeptidase B and  
1087 leucine aminopeptidase by bestatin and its stereoisomer. *Arch Biochem Biophys* 177, 196-200.
- 1088 Suraweera, A., Munch, C., Hanssum, A., and Bertolotti, A. (2012). Failure of amino acid  
1089 homeostasis causes cell death following proteasome inhibition. *Mol Cell* 48, 242-253.
- 1090 Tang, H.K., Tang, H.Y., Hsu, S.C., Chu, Y.R., Chien, C.H., Shu, C.H., and Chen, X. (2009).  
1091 Biochemical properties and expression profile of human prolyl dipeptidase DPP9. *Arch Biochem*  
1092 *Biophys* 485, 120-127.



- 1093 Tsu, B.V., Beierschmitt, C., Ryan, A.P., Agarwal, R., Mitchell, P.S., and Daugherty, M.D. (2020).  
1094 Diverse viral proteases activate the NLRP1 inflammasome. *bioRxiv*, 2020.2010.2016.343426.
- 1095 Tsuge, H., Ago, H., Aoki, M., Furuno, M., Noma, M., Miyano, M., Minami, M., Izumi, T., and  
1096 Shimizu, T. (1994). Crystallization and preliminary X-ray crystallographic studies of recombinant  
1097 human leukotriene A4 hydrolase complexed with bestatin. *J Mol Biol* 238, 854-856.
- 1098 Tu, B.P., and Weissman, J.S. (2004). Oxidative protein folding in eukaryotes: mechanisms and  
1099 consequences. *J Cell Biol* 164, 341-346.
- 1100 Vabulas, R.M., and Hartl, F.U. (2005). Protein synthesis upon acute nutrient restriction relies on  
1101 proteasome function. *Science* 310, 1960-1963.
- 1102 Varfolomeev, E., Blankenship, J.W., Wayson, S.M., Fedorova, A.V., Kayagaki, N., Garg, P.,  
1103 Zobel, K., Dynek, J.N., Elliott, L.O., Wallweber, H.J., *et al.* (2007). IAP antagonists induce  
1104 autoubiquitination of c-IAPs, NF-kappaB activation, and TNFalpha-dependent apoptosis. *Cell*  
1105 131, 669-681.
- 1106 Varshavsky, A. (2011). The N-end rule pathway and regulation by proteolysis. *Protein Sci* 20,  
1107 1298-1345.
- 1108 Vaux, D.L., and Silke, J. (2003). Mammalian mitochondrial IAP binding proteins. *Biochem Biophys*  
1109 *Res Commun* 304, 499-504.
- 1110 Vince, J.E., Wong, W.W., Gentle, I., Lawlor, K.E., Allam, R., O'Reilly, L., Mason, K., Gross, O.,  
1111 Ma, S., Guarda, G., *et al.* (2012). Inhibitor of apoptosis proteins limit RIP3 kinase-dependent  
1112 interleukin-1 activation. *Immunity* 36, 215-227.
- 1113 Waldo, G.S., Standish, B.M., Berendzen, J., and Terwilliger, T.C. (1999). Rapid protein-folding  
1114 assay using green fluorescent protein. *Nat Biotechnol* 17, 691-695.
- 1115 Wang, Q., Gao, H., Clark, K.M., Mugisha, C.S., Davis, K., Tang, J.P., Harlan, G.H., DeSelm, C.J.,  
1116 Presti, R.M., Kutluay, S.B., *et al.* (2021). CARD8 is an inflammasome sensor for HIV-1 protease  
1117 activity. *Science* 371.
- 1118 Wang, Q., Hsiao, J.C., Yardeny, N., Huang, C.H., O'Mara, C.M., Orth-He, E.L., Ball, D.P., and  
1119 Bachovchin, D.A. (2022). The NLRP1 and CARD8 inflammasomes detect reductive stress. 2022  
1120 *submitted*.
- 1121 Wickliffe, K.E., Leppla, S.H., and Moayeri, M. (2008). Killing of macrophages by anthrax lethal  
1122 toxin: involvement of the N-end rule pathway. *Cell Microbiol* 10, 1352-1362.
- 1123 Yang, X., Xue, P., Yuan, M., Xu, X., Wang, C., Li, W., Machens, H.G., and Chen, Z. (2021).  
1124 SESN2 protects against denervated muscle atrophy through unfolded protein response and  
1125 mitophagy. *Cell Death Dis* 12, 805.
- 1126 Zhong, F.L., Robinson, K., Teo, D.E.T., Tan, K.Y., Lim, C., Harapas, C.R., Yu, C.H., Xie, W.H.,  
1127 Sobota, R.M., Au, V.B., *et al.* (2018). Human DPP9 represses NLRP1 inflammasome and protects  
1128 against autoinflammatory diseases via both peptidase activity and FIIND domain binding. *J Biol*  
1129 *Chem* 293, 18864-18878.
- 1130

1131 **FIGURES**

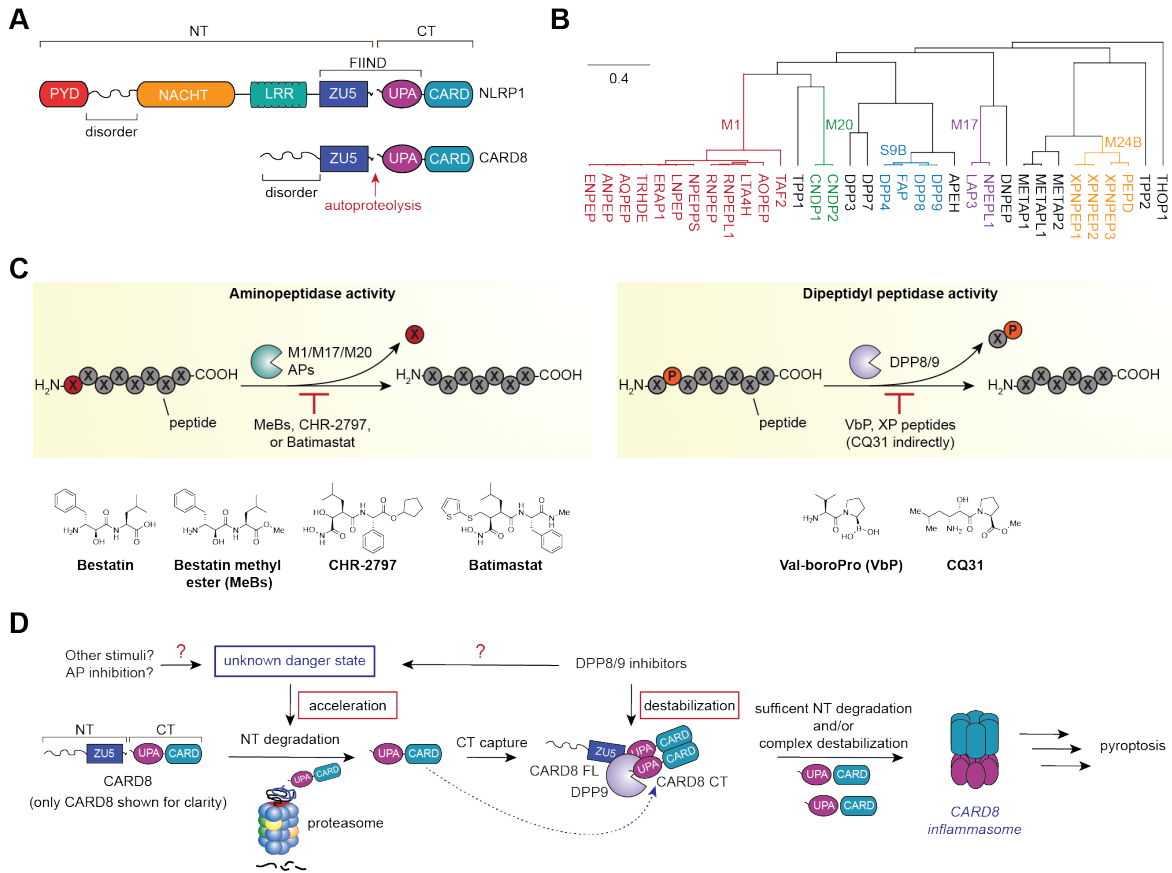

1132  
 1133 **Figure 1. Overview of NLRP1 and CARD8 regulation.** (A) Domain architecture of human  
 1134 NLRP1 and CARD8. The autoproteolysis sites are indicated. (B) Dendrogram of human APs and  
 1135 DPPs involved in peptide hydrolysis. Certain enzyme families are indicated. (C) Schematic of  
 1136 bestatin-sensitive AP activity (left) and VbP-sensitive DPP activity (right). Chemical structures of  
 1137 peptidase inhibitors used in this study are shown. (D) Proposed model for NLRP1 and CARD8  
 1138 inflammasome activation. Constitutive low-level proteasome-mediated degradation of the  
 1139 CARD8/NLRP1 NT fragment releases the CT fragment, which is then captured as part of a ternary  
 1140 complex that also includes DPP9 and full-length (FL) CARD8/NLRP1. Acceleration of NT  
 1141 degradation or destabilization of the ternary complex enables enough CT fragments to escape  
 1142 repression and oligomerize into an inflammasome. DPP8/9 inhibitors, and potentially other  
 1143 stimuli, might induce a danger state that accelerates NT degradation. DPP8/9 inhibitors also  
 1144 destabilize the ternary complexes. See also Tables S1 and S2.

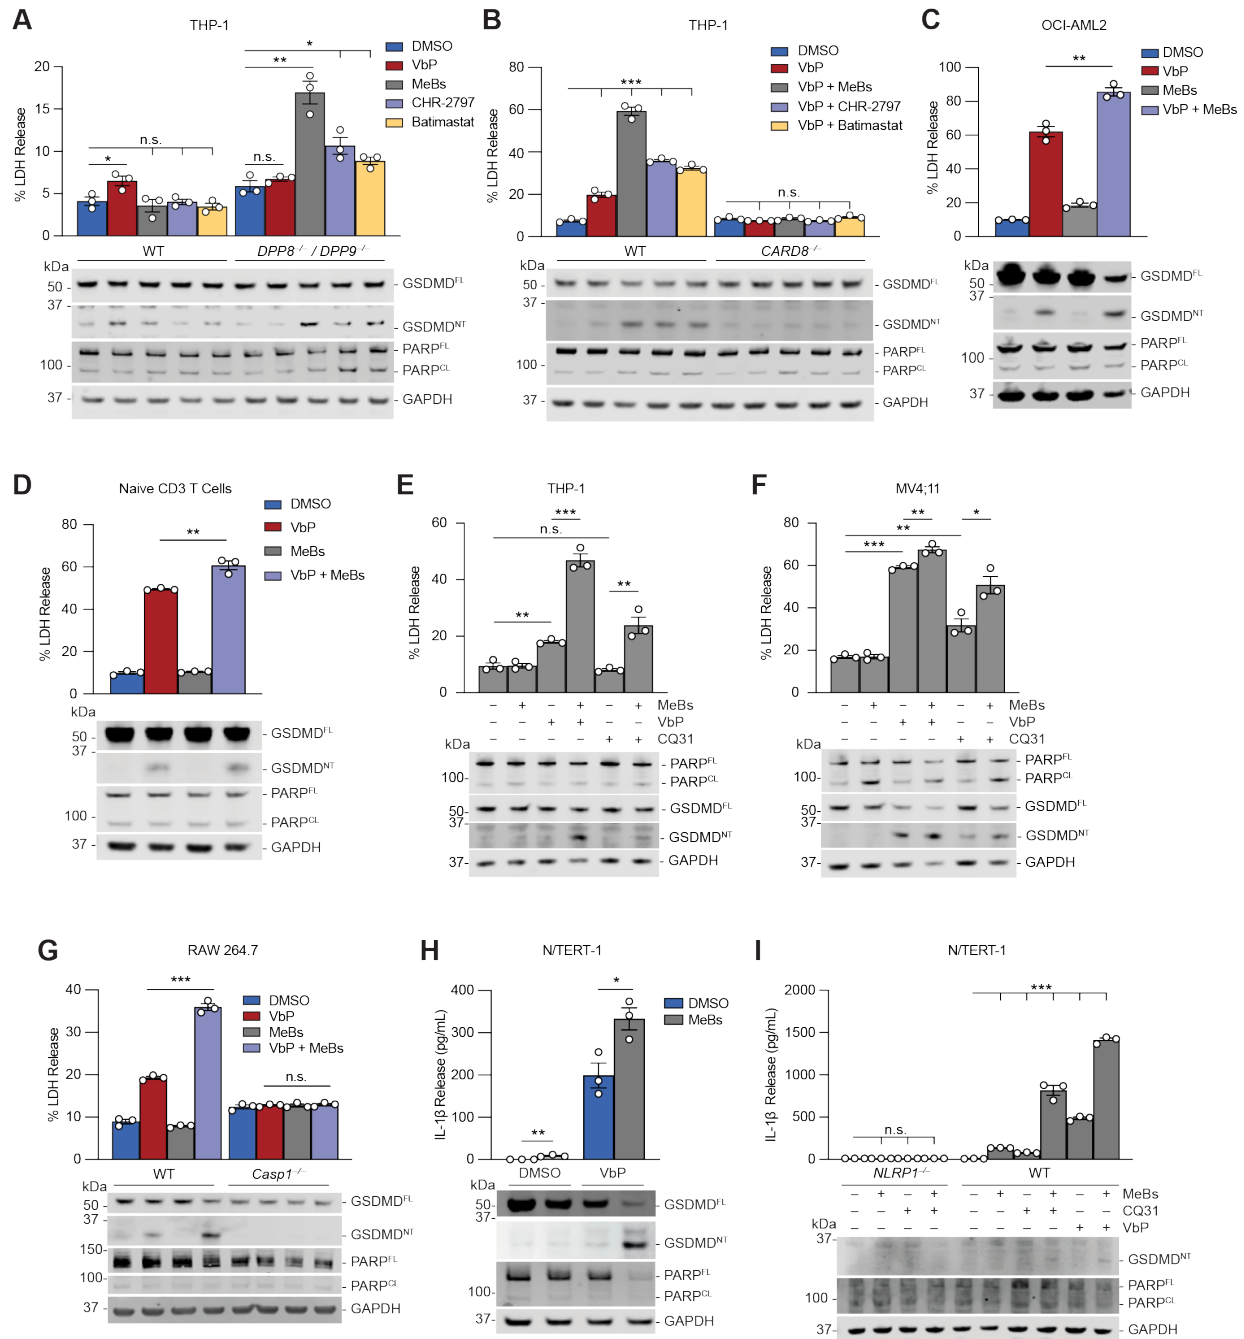

1145  
1146

1147 **Figure 2. Metallo-aminopeptidase inhibitors induce synergistic inflammasome activation**  
 1148 **with DPP8/9 blockade. (A,B)** The indicated THP-1 cells were treated with VbP (10  $\mu$ M), MeBs  
 1149 (10  $\mu$ M), CHR-2797 (10  $\mu$ M), or batimastat (10  $\mu$ M) for 6 h before LDH release and immunoblot  
 1150 analyses. **(C,D)** OCI-AML2 or resting human CD3 T cells were treated with VbP (10  $\mu$ M) and/or  
 1151 MeBs (10  $\mu$ M) for **(C)** 6 h or **(D)** 18 h before LDH release and immunoblot analyses. **(E,F)** THP-1  
 1152 or MV4;11 cells were treated with VbP (10  $\mu$ M), CQ31 (20  $\mu$ M), and/or MeBs (10  $\mu$ M) for 16 h

1153 before LDH release and immunoblot analyses. **(G)** WT or *Casp1*<sup>-/-</sup> RAW 264.7 cells were treated  
1154 with VbP (10  $\mu$ M) and/or MeBs (10  $\mu$ M) for 6 h before LDH release and immunoblot analyses.  
1155 **(H,I)** WT or *NLRP1*<sup>-/-</sup> human N/TERT-1 keratinocytes were treated with VbP (0.2  $\mu$ M), MeBs (20  
1156  $\mu$ M), or CQ31 (20  $\mu$ M) for 24 h before IL-1 $\beta$  release and immunoblot analyses. Data are means  $\pm$   
1157 SEM of 3 replicates. All data, including immunoblots, are representative of three or more  
1158 independent experiments. \*\*\*  $p < 0.001$ , \*\*  $p < 0.01$ , \*  $p < 0.05$  by two-sided Students *t*-test. n.s.,  
1159 not significant. See also Figure S1.  
1160

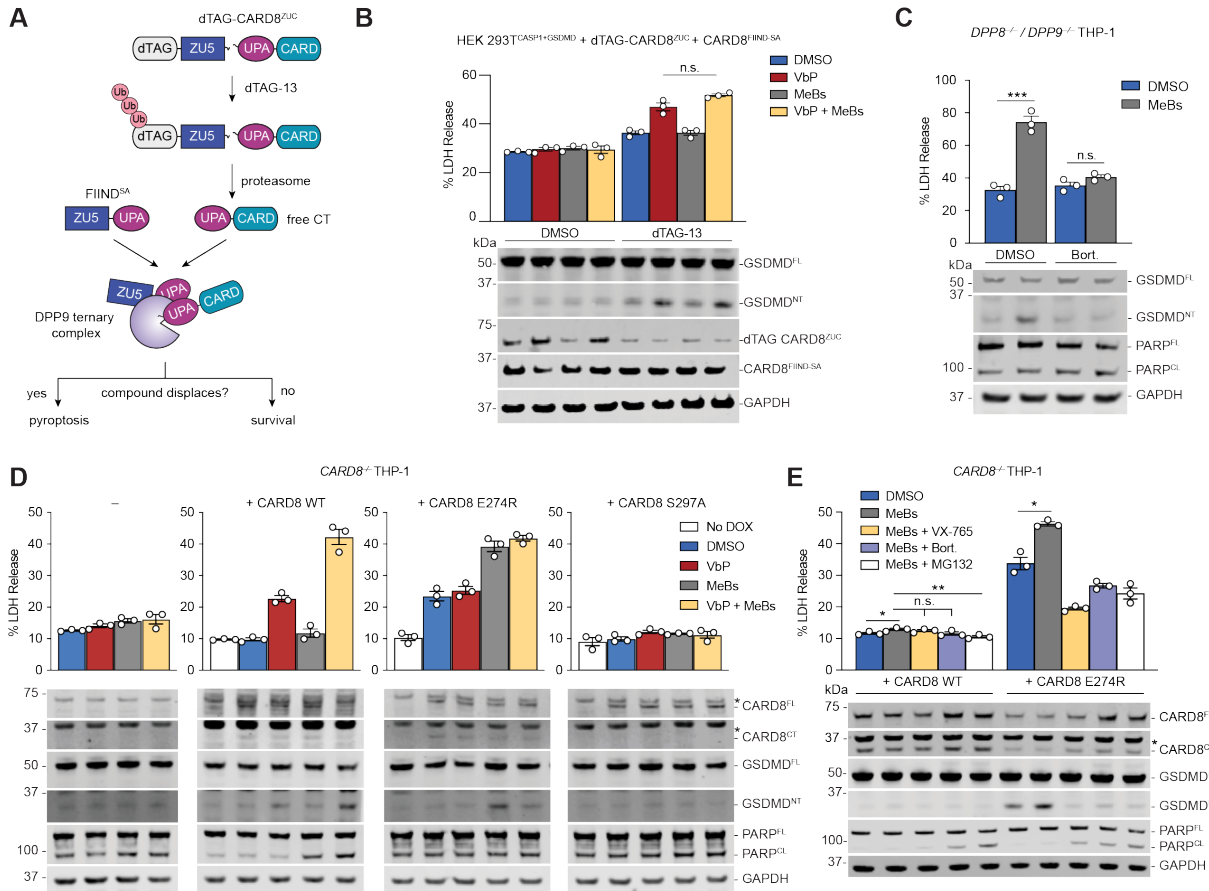

1161  
1162 **Figure 3. AP inhibitors accelerate CARD8<sup>NT</sup> degradation.** (A) Schematic of the experiment to  
1163 assess DPP9-CARD8 ternary complex displacement in cells. (B) HEK 293T<sup>CASP1+GSDMD</sup> cells were  
1164 transiently transfected plasmids encoding dTAG-CARD8<sup>ZUC</sup> and the isolated FIIND<sup>SA</sup> 48 h prior  
1165 to treatment with dTAG-13 (500 nM), VbP (10  $\mu$ M), MeBs (10  $\mu$ M), or the combination for 6 h.  
1166 Samples were collected and analyzed by immunoblotting and LDH release. (C) DPP8<sup>-/-</sup>/DPP9<sup>-/-</sup>  
1167 THP-1 cells were treated with MeBs (10  $\mu$ M) and/or bortezomib (Bort., 10  $\mu$ M) for 8 h before LDH  
1168 and immunoblot analyses. (D,E) CARD8<sup>-/-</sup> THP-1 cells stably containing doxycycline (DOX)-  
1169 inducible CARD8 WT, E274R, and/or S297A were induced with 100 ng/mL DOX for 16 h prior to  
1170 treatment with VbP (10  $\mu$ M), MeBs (10  $\mu$ M), VX765 (50  $\mu$ M), Bort. (10  $\mu$ M), and/or MG132 (10  
1171  $\mu$ M) for 6 h. Samples were then collected for LDH release and immunoblot analyses. Note in (D)  
1172 that immunoblot and LDH analyses were performed separately. Data are means  $\pm$  SEM of 3  
1173 replicates. All data, including immunoblots, are representative of three or more independent  
1174 experiments. \*\*\*  $p < 0.001$ , \*\*  $p < 0.01$ , \*  $p < 0.05$  by two-sided Students  $t$ -test. n.s., not  
1175 significant. See also Figure S2.  
1176

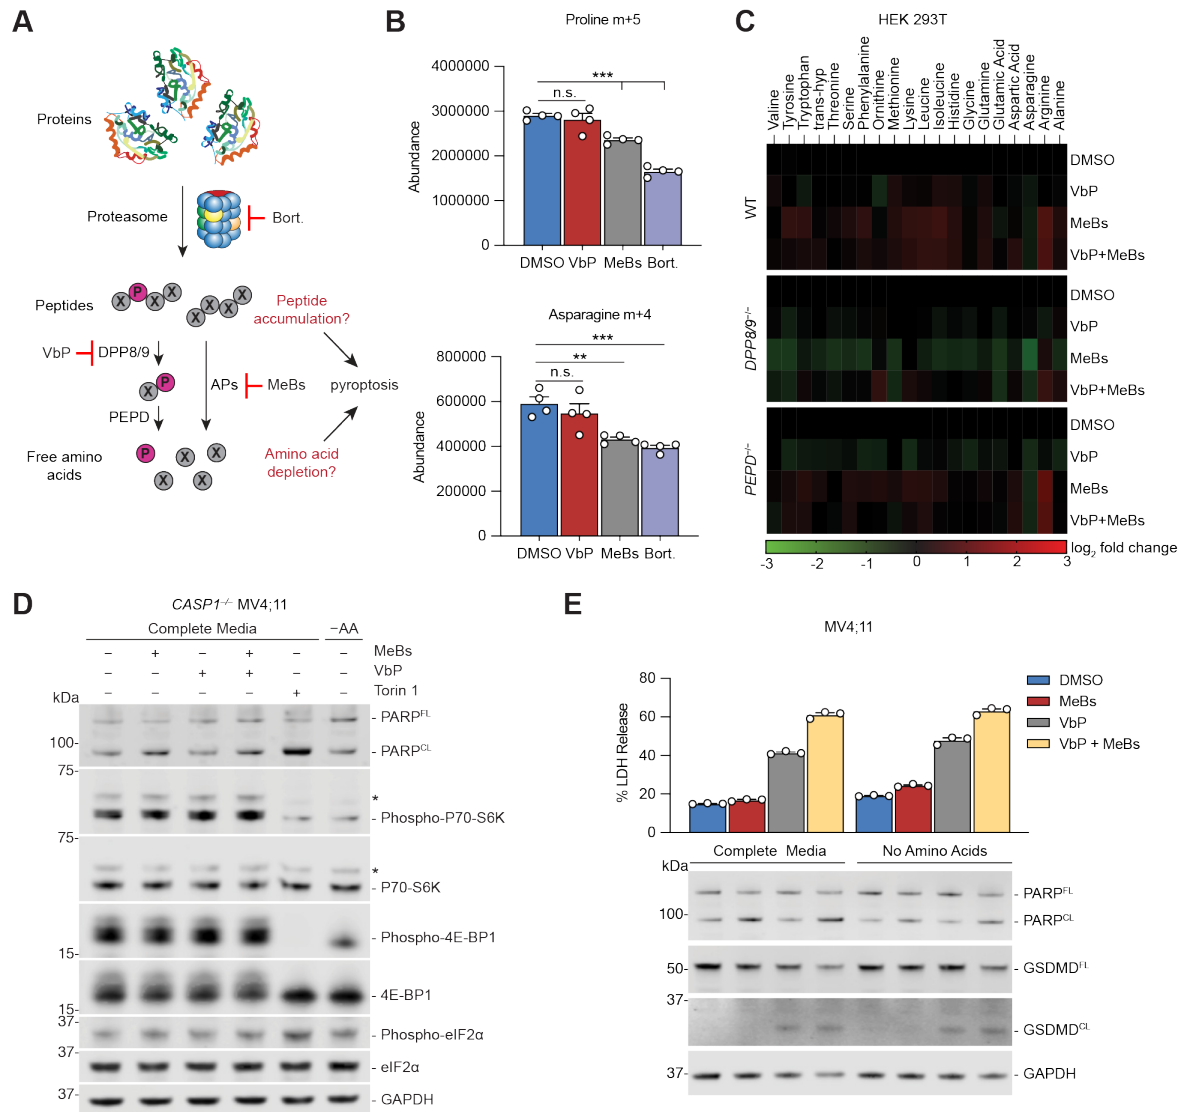

1177  
1178  
1179  
1180  
1181  
1182  
1183  
1184  
1185  
1186  
1187  
1188  
1189  
1190  
1191

**Figure 4. Amino acid depletion does not activate NLRP1 or CARD8.** (A) Schematic of amino acid recycling from proteins. (B) HEK 293T cells were cultured in media supplemented with [<sup>13</sup>C]glutamine and [<sup>13</sup>C]leucine for 3 weeks prior to replacement with unlabeled media and simultaneous treatment with VbP (10 μM), MeBs (10 μM) or Bortezomib (Bort., 10 μM). Following 6 h of treatment, cell extracts were profiled for levels of glutamine-derived <sup>13</sup>C-labeled amino acids. Data are means ± SEM of 4 replicates. (C) Heatmap of amino acid levels in WT, *DPP8/9*<sup>-/-</sup> and *PEPD*<sup>-/-</sup> HEK 293T cells treated with VbP (10 μM) and/or MeBs (10 μM) for 3 h. (D) *CASP1*<sup>-/-</sup> MV4;11 cells were deprived of amino acids or treated with MeBs (10 μM), VbP (10 μM) or Torin1 (10 μM) for 6 h before immunoblot analysis of amino acid deprivation markers. (E) MV4;11 cells were cultured in amino acid-free RPMI supplemented with or without MEM amino acids and treated with MeBs (10 μM) and/or VbP (10 μM) for 6 h, followed by LDH release and immunoblot analysis. Data are means ± SEM of 3 replicates unless otherwise stated. \*\*\* *p* < 0.001, \*\* *p* < 0.01 by two-sided Student's *t*-test. n.s., not significant. See also Figure S3 and Table S3.

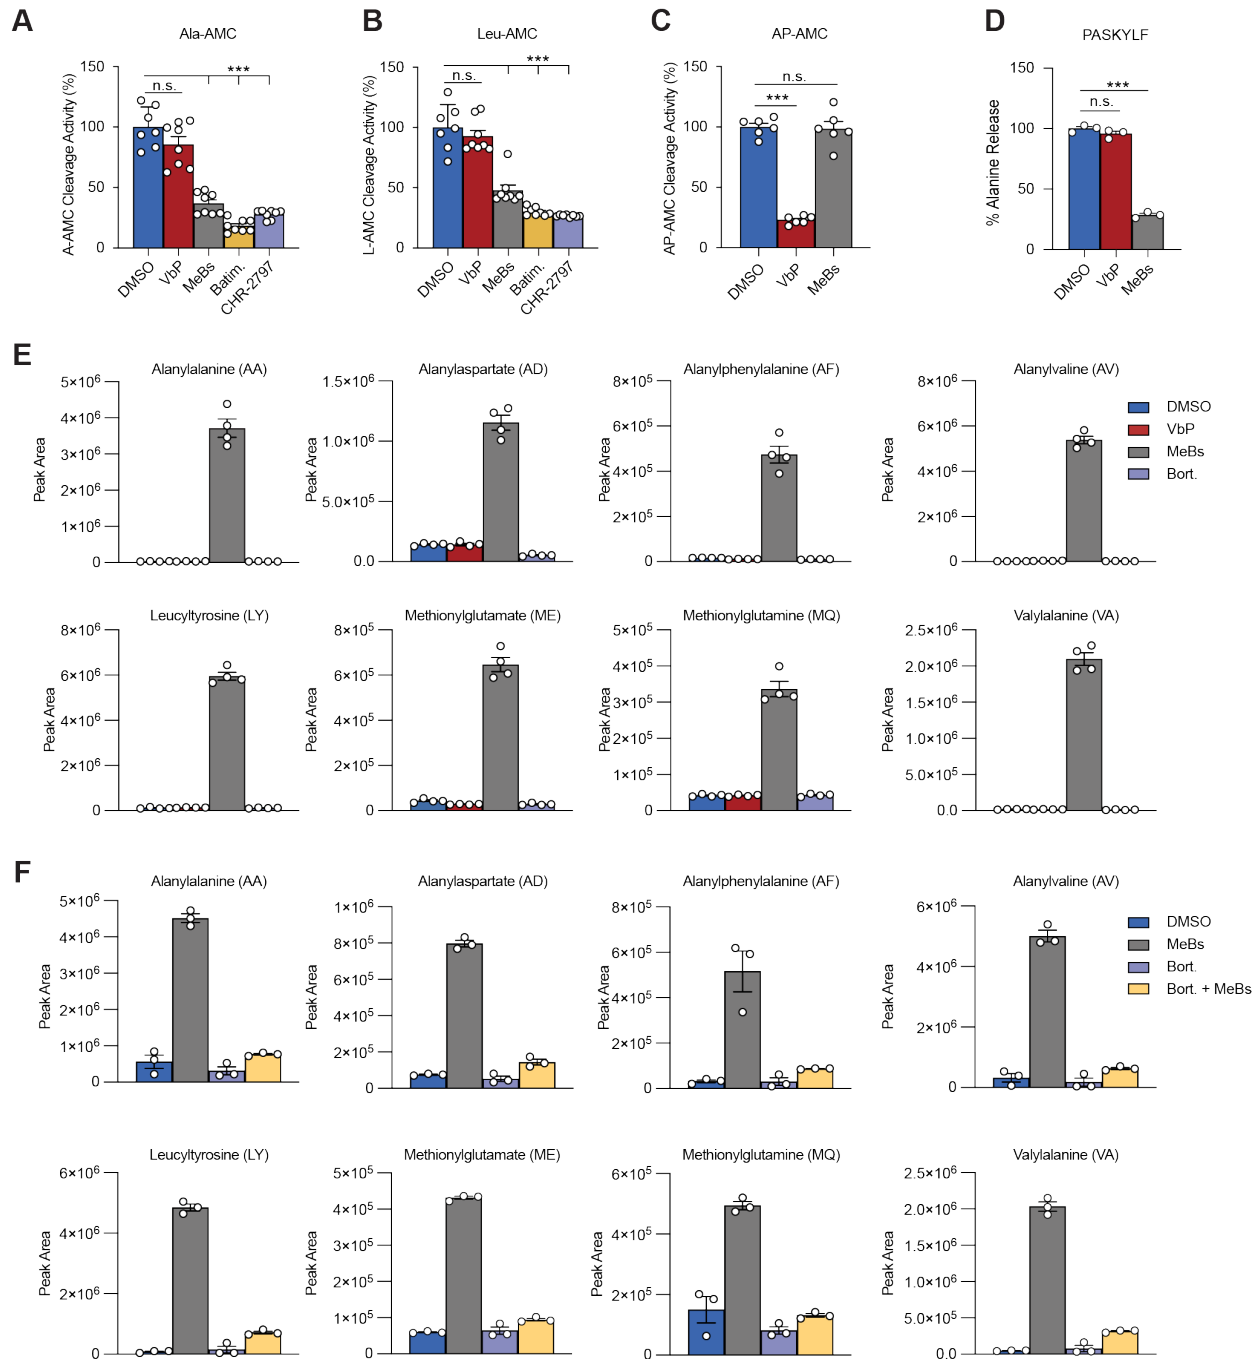

1192

1193

1194

1195 **Figure 5. MeBs causes proteasome-derived peptide accumulation. (A-C)** Inhibition of the

1196 indicated peptidase activity in *CARD8*<sup>-/-</sup> THP-1 (A,B) or HEK 293T (C) cells by VbP (10 μM),

1197 MeBs (10 μM), Batimastat (Batim., 10 μM) or CHR-2797 (10 μM). (D) HEK 293T cell lysates (0.5

1198 mg/mL) were incubated with the peptide PASKYLF (1 mM) and VbP (10 μM) or MeBs (10 μM) for

1199 6 h prior to quantitation of peptide cleavage by an alanine release assay. (E) HEK 293T cells were

1200 treated with VbP (10 μM), MeBs (10 μM), or Bortezomib (10 μM) for 6 h. Intracellular metabolites

1201 were extracted and the indicated dipeptide concentrations were measured by LC-MS. (F) HEK

1202 293T cells were pre-treated with vehicle (DMSO) or Bort. (10 μM) for 30 min, then treated with

vehicle (DMSO) or MeBs (10 μM) for 5.5 h. Intracellular metabolites were extracted and dipeptide



1203 concentrations were measured by LC-MS. Data are means  $\pm$  SEM of 3 or more replicates.  
1204 Peptidase activity data is representative of three or more independent experiments, while  
1205 endogenous peptide measurement data was collected in a single experiment. \*\*\*  $p < 0.001$  by  
1206 two-sided Students  $t$ -test. n.s., not significant. See also Figure S4.  
1207

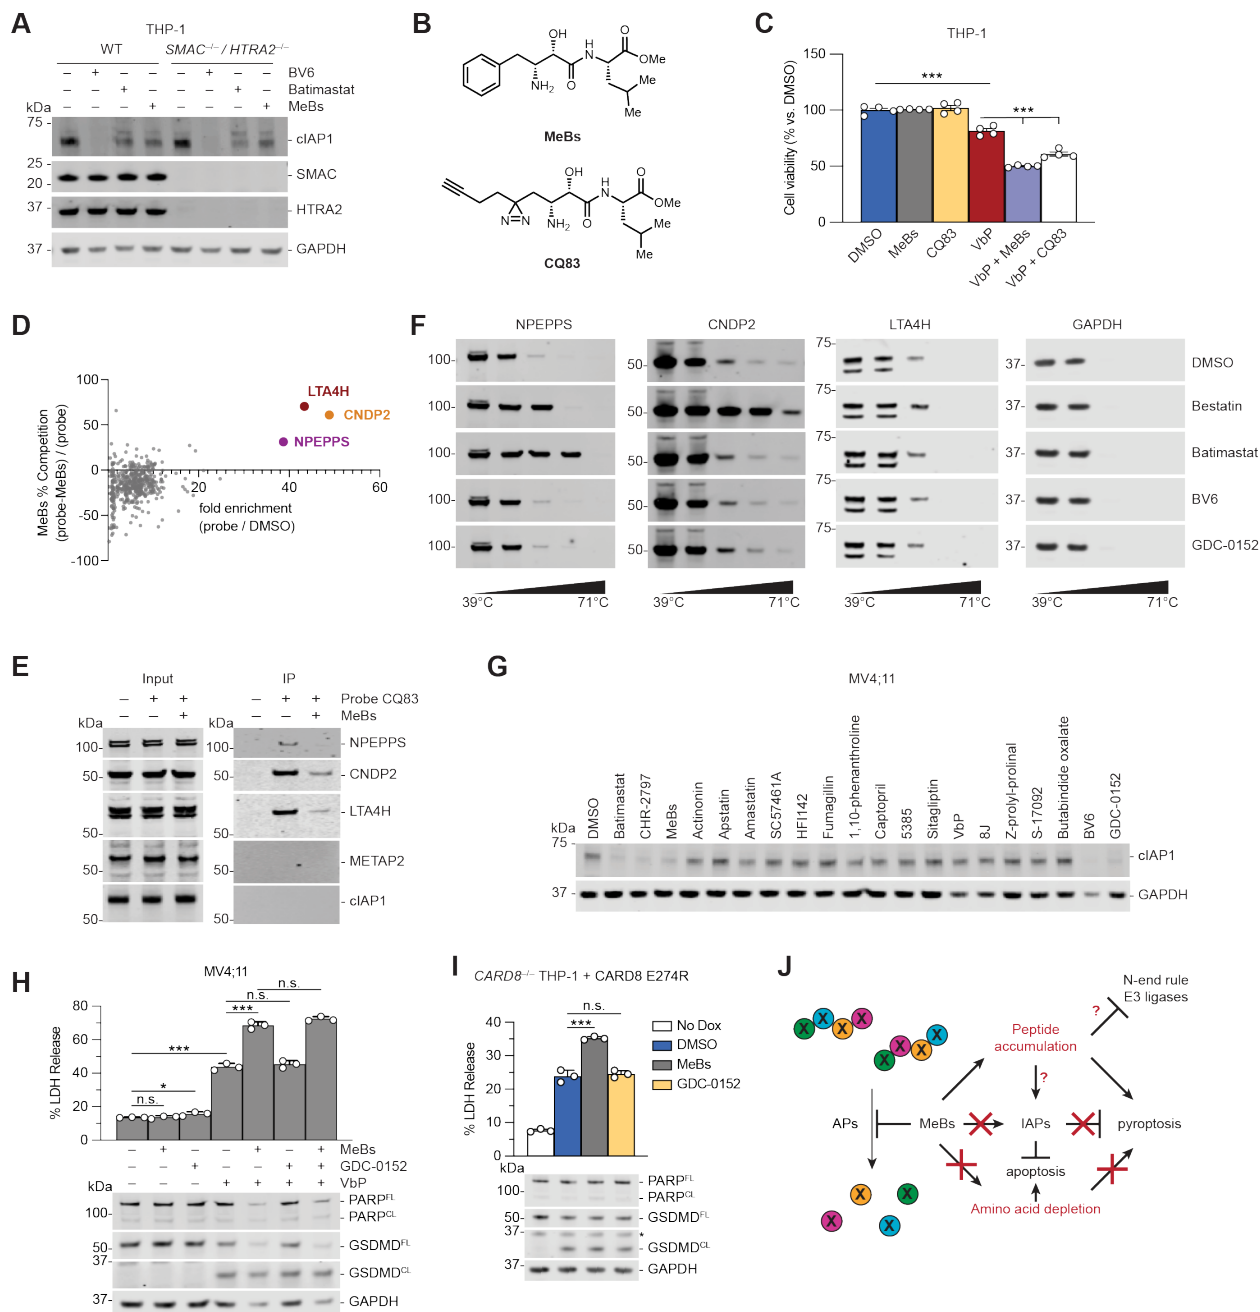

1208  
1209

1210 **Figure 6. AP inhibition induces cIAP1 and NT degradation independently.** (A) WT or  
1211 *SMAC<sup>-/-</sup>/HTRA2<sup>-/-</sup>* THP-1 cells were treated with MeBs (10  $\mu$ M), Batimastat (10  $\mu$ M) or BV6 (5  
1212  $\mu$ M) for 24h prior to immunoblot analysis. (B) Chemical structures of MeBs (top) and CQ83  
1213 (bottom). (C) THP-1 cells were treated with MeBs (1  $\mu$ M), CQ83 (1  $\mu$ M), and/or VbP (10  $\mu$ M), and  
1214 cell viability was assessed by CellTiter-Glo (CTG) after 6 h. (D,E) Scatter plot (D) and  
1215 immunoblots (E) depict the proteins enriched by CQ83 and competed by MeBs as determined by  
1216 TMT-MS (D) or immunoblotting (E). (F) CETSA analyses of bestatin (10  $\mu$ M), Batimastat (10  $\mu$ M),  
1217 BV6 (5  $\mu$ M) and GDC-0152 (5  $\mu$ M) in HEK 293T cell lysates. (G) MV4;11 cells were treated with  
1218 the indicated aminopeptidase inhibitors or IAP agonists (BV6, GDC-0152) for 24 h prior to  
1219 immunoblotting analysis. All compounds were treated at 10  $\mu$ M except: fumagillin (3  $\mu$ M);  
1220 compound 5385 (DPP7 inhibitor; 20  $\mu$ M), compound 8j (selective DPP8/9 inhibitor; 20  $\mu$ M), and

1221 sitagliptin (DPP4 inhibitor; 20  $\mu$ M), VbP (2  $\mu$ M), BV6 (5  $\mu$ M), and GDC-0152 (5  $\mu$ M). (H) MV4;11  
1222 cells were treated with VbP (10  $\mu$ M), MeBs (10  $\mu$ M), and/or GDC-0152 (5  $\mu$ M) for 6 h prior to LDH  
1223 and immunoblot analyses. (I) *CARD8*<sup>-/-</sup> THP-1 cells stably containing doxycycline (DOX)-  
1224 inducible *CARD8* E274R were induced with 100 ng/mL DOX for 16 h prior to treatment with  
1225 DMSO, MeBs (10  $\mu$ M) or GDC-0152 (5  $\mu$ M) for 6 h. Samples were then collected for LDH release  
1226 and immunoblot analyses. (J) The proposed biological impacts of MeBs. MeBs inhibits APs,  
1227 resulting in blockade of amino acid recycling and peptide accumulation. Some peptides bind to  
1228 and thereby degrade cIAP1, some inhibits the N-end rule pathway, and some trigger  
1229 *CARD8/NLRP1* NT degradation. The peptides that modulate each of these effects are likely (at  
1230 least partially) distinct. Data are means  $\pm$  SEM of 3 or more replicates. All data, including  
1231 immunoblots, are representative of three or more independent experiments. \*\*\*  $p < 0.001$ , \*  $p <$   
1232 0.05 by two-sided Students *t*-test. n.s., not significant. See also Figure S5 and Table S4.  
1233

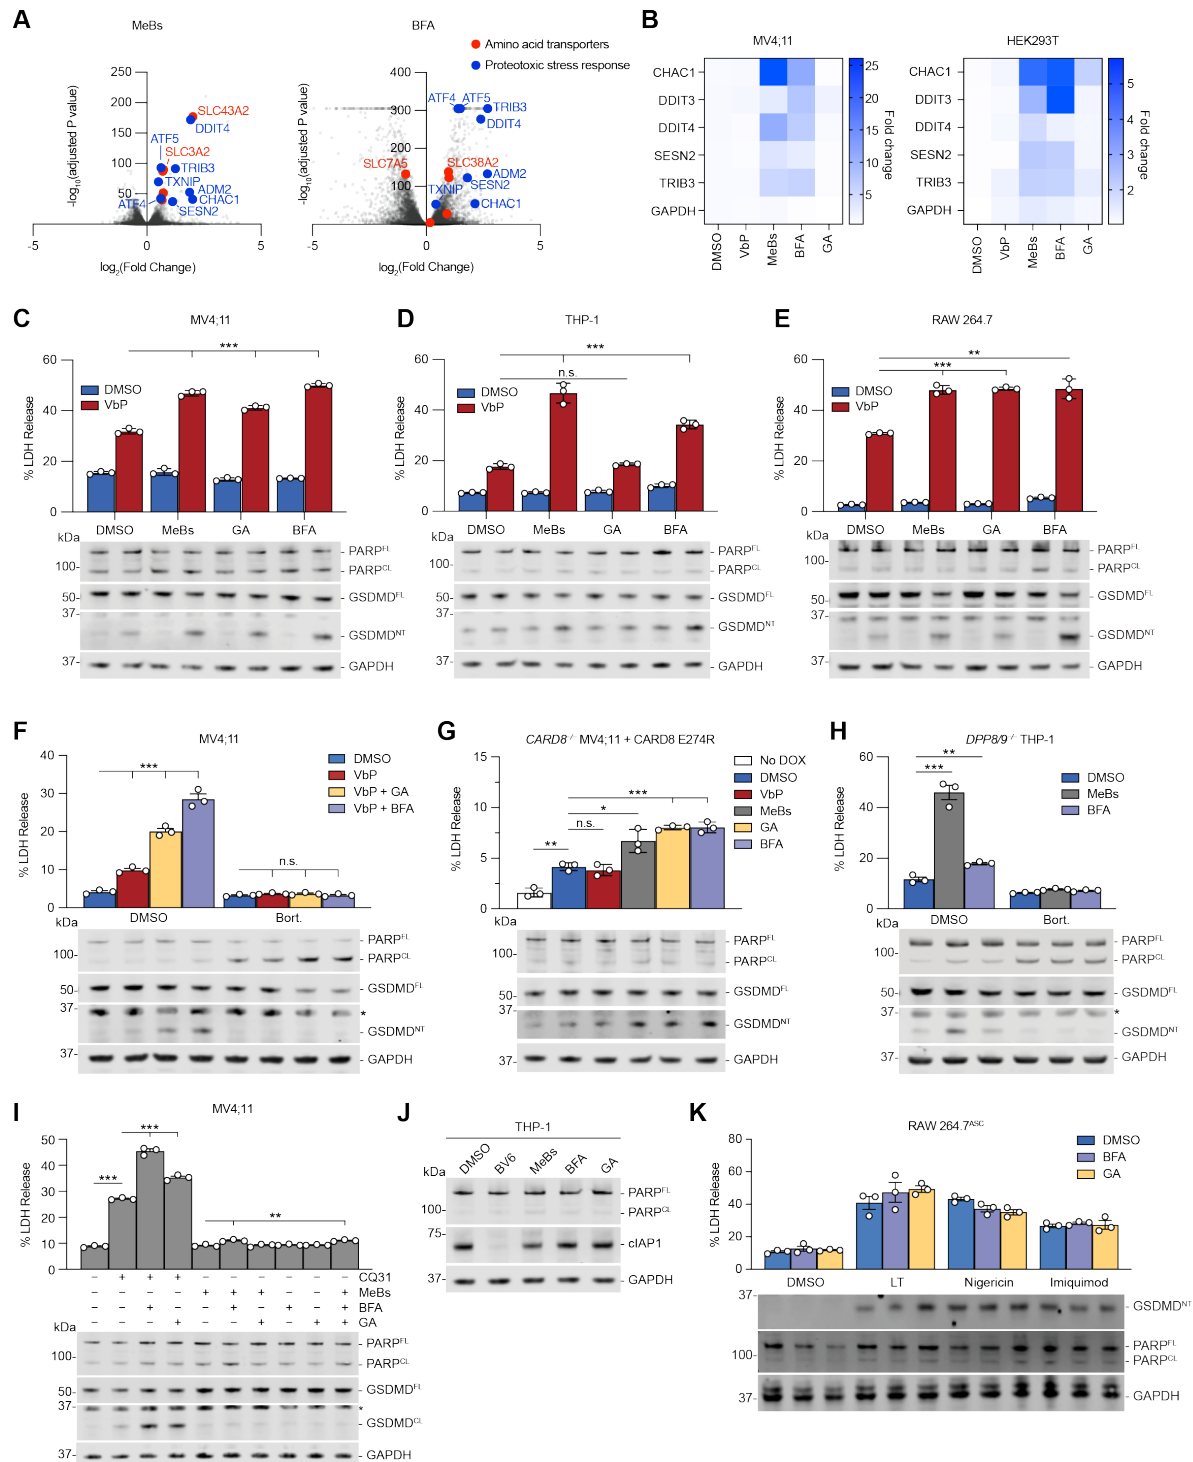

1234  
1235

1236 **Figure 7. Proteotoxic agents accelerate NT degradation.** (A,B) *CASP1*<sup>-/-</sup> MV4;11 and/or HEK  
1237 293T cells were treated with VbP (10  $\mu$ M), MeBs (10  $\mu$ M), brefeldin A (BFA; 1.78  $\mu$ M) or  
1238 Geldanamycin (GA; 1  $\mu$ M) for 6 h before gene expression relative to a DMSO control was  
1239 determined by RNA-seq (A) or RT-qPCR (B). (C-F) The indicated cell lines cell lines were treated

1240 with MeBs (10  $\mu$ M), GA (1  $\mu$ M), BFA (1.78  $\mu$ M), Bort. (10  $\mu$ M) and/or VbP (10  $\mu$ M) for 6 h prior to  
1241 LDH and immunoblot analyses. **(G)** *CARD8*<sup>-/-</sup> MV4;11 cells stably expressing doxycycline (DOX)-  
1242 inducible CARD8 E274R are treated with DOX (1  $\mu$ g/mL), VbP (10  $\mu$ M), MeBs (10  $\mu$ M), GA (1  
1243  $\mu$ M), or BFA (1.78  $\mu$ M) for 6 h prior to LDH and immunoblot analyses. **(H)** *DPP8*<sup>-/-</sup>/*DPP9*<sup>-/-</sup> THP-  
1244 1 cells were treated with MeBs (10  $\mu$ M), BFA (1.78  $\mu$ M) and/or Bort. (10  $\mu$ M) for 8 h prior to LDH  
1245 release and immunoblot analyses. **(I)** MV4;11 cells were treated with CQ31 (20  $\mu$ M) for 22 h,  
1246 and/or MeBs (10  $\mu$ M), GA (1  $\mu$ M), or BFA (1.78  $\mu$ M) for 6 h prior to LDH and immunoblot analyses.  
1247 **(J)** THP-1 cells were treated with BV6 (5  $\mu$ M) MeBs (10  $\mu$ M), GA (1  $\mu$ M), or BFA (1.78  $\mu$ M) for 6  
1248 h prior to immunoblot analysis. Data are means  $\pm$  SEM of 3 replicates. **(K)** RAW 264.7 cells stably  
1249 expressing ASC were treated with LPS (5  $\mu$ g/mL) for 16 h prior to treatment with BFA (1.78  $\mu$ M)  
1250 for 6 h, GA (1  $\mu$ M) for 6 h, anthrax lethal factor and protective antigen (LT; 1  $\mu$ g/mL each) for 6 h,  
1251 nigericin (10  $\mu$ M) for 3 h and/or imiquimod (100  $\mu$ M) for 3 h. LDH and immunoblot analyses were  
1252 performed. All data, including immunoblots, are representative of three or more independent  
1253 experiments. \*\*\*  $p < 0.001$ , \*\*  $p < 0.01$ , \*  $p < 0.05$  by two-sided Students *t*-test. N.s., not significant.  
1254 See also Figure S6 and Table S5.
